1                   **EGR1 transcriptional control of human cytomegalovirus latency**  
2  
3  
4

5           **Jason Buehler<sup>1</sup>, Ethan Carpenter<sup>1,2</sup>, Sebastian Zeltzer<sup>1</sup>, Suzu Igarashi<sup>1</sup>, Michael Rak<sup>1</sup>,**  
6                   **Iliyana Mikell<sup>3</sup>, Jay A. Nelson<sup>3</sup>, and Felicia Goodrum<sup>1,4</sup>**  
7  
8  
9

10   <sup>1</sup>BIO5 Institute, University of Arizona, Tucson, AZ 85721  
11

12   <sup>2</sup> Current Address for Ethan Carpenter: Neuroscience Program, Macalester College, St. Paul,  
13   MN 55105  
14

15   <sup>3</sup>Vaccine and Gene Therapy Institute, Oregon Health & Science University, Beaverton, Oregon,  
16   97006, USA  
17

18   <sup>4</sup>Department of Immunobiology, University of Arizona, Tucson, AZ 85721  
19  
20  
21

22   **Running title: EGR1 regulates UL138 for CMV latency**  
23  
24  
25

26   \*Corresponding Author:  
27   Felicia D. Goodrum, PhD  
28   Department of Immunobiology  
29   BIO5 Institute  
30   University of Arizona  
31   Tucson AZ 85721  
32   (520) 626-7468  
33   fgoodrum@email.arizona.edu

34 **ABSTRACT**

35 Sustained phosphoinositide3-kinase (PI3K) signaling is critical to the maintenance of  
36 herpesvirus latency. We have previously shown that the beta-herpesvirus, human  
37 cytomegalovirus (CMV), regulates epidermal growth factor receptor (EGFR), upstream of PI3K,  
38 to control states of latency and reactivation. Inhibition of EGFR signaling enhances CMV  
39 reactivation from latency and increases viral replication, but the mechanisms by which EGFR  
40 impacts replication and latency is not known. We demonstrate that HCMV downregulates  
41 MEK/ERK and AKT phosphorylation, but not STAT3 or PLC $\gamma$  for productive replication.  
42 Similarly, inhibition of either MEK/ERK or PI3K/AKT, but not STAT or PLC $\gamma$ , pathways increases  
43 viral reactivation from latently infected CD34<sup>+</sup> hematopoietic progenitor cells (HPCs), defining a  
44 role for these pathways in latency. We hypothesized that CMV modulation of EGFR signaling  
45 might impact viral transcription. Indeed, EGF-stimulation increased expression of the *UL138*  
46 latency gene, but not immediate early or early viral genes, suggesting that EGFR signaling  
47 promotes latent gene expression. The early growth response-1 (EGR1) transcription factor is  
48 induced downstream of EGFR signaling through both PI3K/AKT and MEK/ERK pathways.  
49 EGR1 expression is important for the maintenance of HPC stemness and its downregulation  
50 drives HPC differentiation and mobilization. We demonstrate that EGR1 binds upstream of  
51 *UL138* and is sufficient to promote *UL138* expression. Further, disruption of EGR1 binding  
52 upstream of *UL138* prevented CMV from establishing a latent infection in CD34<sup>+</sup> HPCs. Our  
53 results indicate a model whereby *UL138* modulation of EGFR signaling feeds back to promote  
54 *UL138* expression and suppression of replication to establish or maintain viral quiescence.

55

56 **AUTHOR SUMMARY**

57 CMV regulates EGFR signaling to balance states of viral latency and replication. CMV blocks  
58 downstream PI3K/AKT and MEK/ERK signaling pathways through down-regulation of EGFR at  
59 the plasma membrane. PI3K/AKT and MEK/ERK signaling increases expression of the EGR1  
60 transcription factor that is necessary for the maintenance of stem cell stemness. A decrease in  
61 EGR1 expression promotes HPC mobilization to the periphery and differentiation, a known  
62 stimulus for CMV reactivation. We identified functional EGR1 binding sites upstream of the  
63 *UL138* gene and EGR-1 binding stimulates *UL138* expression. Additionally, down-regulation of  
64 EGR1 by CMV miR-US22 decreases *UL138* expression emphasizing the importance of this  
65 transcription factor in expression of this latency gene. Lastly, we demonstrate that a CMV  
66 mutant virus lacking an upstream EGR1 binding site is unable to establish latency in CD34<sup>+</sup>  
67 HPCs. This study defines one mechanism by which EGFR signaling impacts viral gene  
68 expression to promote CMV latency.

69

## 70 **INTRODUCTION**

71 The mechanisms by which herpesviruses persist through the establishment of a quiescent  
72 infection, known as latency, and reactivate for continued transmission are incompletely defined.  
73 It is known that herpesviruses sense and respond to changes in the host cell signaling, such as  
74 that associated with stress and differentiation, to modulate the decisions to maintain latency or  
75 to reactivate. However, the molecular underpinnings of how these cellular signals induce  
76 changes in chromatin and viral gene expression are less well defined. Human cytomegalovirus  
77 (CMV) is a beta-herpesvirus that persists within the majority of the human population. During  
78 infection of an immunocompetent host, CMV has a protracted acute phase and then establishes  
79 a life-latent infection, which is marked by sporadic subclinical reactivation events. CMV  
80 establishes latency in CD34<sup>+</sup> hematopoietic progenitor cells (HPCs) and is carried through

81 differentiation in cells of the myeloid lineage, including CD14+ monocytes (1). During latency in  
82 experimental models, CMV genes are expressed broadly but at very low levels (2, 3) and  
83 replication is restricted. Reactivation in immunodeficient individuals, such as stem cell or solid  
84 organ transplant recipients, is a major cause for morbidity and mortality (4-6). Additionally, CMV  
85 reactivation in patients undergoing intensive chemotherapy treatments can cause severe  
86 pathologies, including pneumonia, enteritis, blindness, and deafness(7, 8). Currently, there is no  
87 vaccine and existing antivirals have toxicity issues and cannot target latently infected cells.  
88 Understanding the molecular mechanisms that define and control the latent CMV infection is  
89 critical for the development of novel strategies to target the latent infection.

90

91 Virus manipulation of host cell signaling during infection of hematopoietic cells provides the  
92 means by CMV ensures survival of the infected cells and control differentiation and reactivation  
93 (9-14). Epidermal growth factor receptor (EGFR) signaling is a key component of the molecular  
94 switch regulating the establishment of latency and reactivation of viral replication (15). In CD34+  
95 HPCs, CMV stimulates EGFR during entry and these initial signaling events are important for  
96 the establishment of latency (16). EGFR also serves as an entry receptor for CMV into  
97 fibroblasts (17), although sustained EGFR signaling represses productive replication (15).

98

99 The CMV UL135 and UL138 gene products antagonize on another in regulating latency and  
100 reactivation (18). UL138 is suppressive to virus replication and critical for the establishment of  
101 latency, whereas UL135 is important for reactivation. UL135 functions, in part, by overcoming  
102 the suppressive effects of UL138, which otherwise block the initiation of viral replication from  
103 infectious genomes Accordingly, UL135 and UL138 gene products both interact with EGFR, but  
104 have opposing effects on the regulation of EGFR trafficking and signaling (15). UL135, reduces

105 total and cell surface levels of EGFR. UL135 regulates EGFR trafficking and signaling through  
106 its interactions with the host adapter proteins for the Cbl E3 ubiquitin ligase, Abelson interacting  
107 protein 1 (Abi1), CIN85 and CD2AP (15, 19). Mutations in *UL135* ablating these host  
108 interactions restore EGFR levels in infected fibroblasts and diminish reactivation from latent  
109 infection (19). The mechanism by which UL138 regulates EGFR is less clear. However, in  
110 contrast to UL135, UL138 increases cell surface levels of EGFR in productively infected  
111 fibroblasts and is important for sustained EGFR signaling activity (15). The interactions between  
112 UL135 and Abi-1 and CIN85/CD2AP are required for reactivation, directly linking UL135-  
113 mediated degradation of EGFR to reactivation (20).

114

115 In this study, we defined the PI3K/AKT and MEK/ERK pathways downstream of EGFR as  
116 important to the establishment of latency using our experimental CD34<sup>+</sup> HPC model. By  
117 contrast, the PLC $\gamma$  and STAT pathways did not impact latency in our system. Additionally, EGF-  
118 stimulation increased UL138 gene expression, suggesting that EGFR signaling impacts latency  
119 gene expression. We mapped consensus binding sites for the early growth response factor 1  
120 (EGR1) transcription factor upstream of *UL138*. EGR1 is highly expressed in CD34<sup>+</sup> HPCs and  
121 is required to maintain stemness (21). Here, we show that EGR1 binds to sites within the  
122 *UL133-UL138* gene locus and stimulates UL138 gene expression and these sites are required  
123 to maintain latency in CD34<sup>+</sup> HPCs. From these findings a positive feedback model emerges  
124 where by UL138 sustains EGFR signaling and EGFR signaling stimulates EGR1, which then  
125 drives UL138 gene expression. Disruption of EGR-1 regulation of UL138 expression results in a  
126 loss of latency and the virus replicates. This work defines one mechanism by which EGFR  
127 signaling impacts viral gene expression to regulate CMV latency and reactivation.

128

129 **RESULTS**

130 **CMV downregulates total and cell surface levels of EGFR.** We previously demonstrated that  
131 CMV modulates EGFR total and cell surface levels during infection in fibroblasts (productive  
132 infection) and CD34<sup>+</sup> HPCs (site of latency)(15). In fibroblasts, we demonstrated that EGFR  
133 surface and total levels decrease substantially by 48 hours post infection (hpi). To further  
134 understand the regulation of EGFR during productive infection, we analyzed surface and total  
135 levels of EGFR in fibroblasts over a time course of infection from 0-72 hpi. Fibroblasts were  
136 infected with the TB40/E strain expressing GFP as a marker for infection (22), which serves as  
137 the parental/wild-type (WT) virus for all studies and EGFR surface levels were measured by flow  
138 cytometry (Fig. 1A). EGFR surface levels began to decrease by 12 hpi and were reduced to  
139 ~60% of uninfected cells by 24 hpi, and remained between 50 and 60% of uninfected cells for  
140 the remainder of the infection time course. Analysis of total EGFR levels over the same time  
141 course indicated that total EGFR levels were reduced to 40% and 20% of uninfected cells by 48  
142 and 72 hpi, respectively (Fig. 1B). These findings are consistent with our previous work  
143 demonstrating the downregulation of EGFR during the productive cycle of infection (15, 20) and  
144 extend those observations by defining the onset of this downregulation as within the early  
145 stages of infection.

146  
147 CMV was previously shown to transcriptionally downregulate EGFR (23, 24). While UL135  
148 downregulates, total levels of EGFR (15, 20), disruption of UL135 or its interaction with host  
149 proteins does not fully restore EGFR to uninfected cell levels. This might be explained by a  
150 transcriptional downregulation of EGFR. However, we did not detect any significant alteration in  
151 EGFR mRNA levels by quantitative reverse transcriptase PCR (RT-qPCR) over the time course  
152 of infection(Fig. 1C). The lack of a transcriptional downregulation in our study may reflect

153 difference in the virus strain used for infection or the cells type, and leaves open the possibility  
154 that other viral factors contribute to the diminishment of EGFR levels.

155

156 We previously observed a re-localization of EGFR to the viral assembly compartment during  
157 productive replication (15). To determine the timing of EGFR re-localization, EGFR subcellular  
158 localization was determined in TB40/E infected fibroblasts at (Fig. 1D). IE2 was used to mark  
159 infected cells. In uninfected cells (0 hpi) EGFR staining is localized at the plasma membrane  
160 and distributed in puncta throughout the cytoplasm. Although, the distribution of EGFR was not  
161 dramatically altered between 6 and 12 hpi, a large portion of EGFR re-localized at 24 hpi to a  
162 juxta-nuclear region and is maintained there. We previously demonstrated that this juxta-nuclear  
163 localization is proximal with markers, GM130 and pp28, for the viral assembly compartment  
164 (15). However, this result indicated that EGFR is re-localized at early times in infection prior to  
165 the formation of the assembly compartment.

166

167 **EGFR and downstream pathways are inhibited by CMV as replication progresses.** To  
168 determine how CMV productive infection impacts EGFR signaling and pathways downstream of  
169 EGFR, we analyzed phosphorylation of EGFR, MEK1/2, ERK1/2, STAT3, PLC $\gamma$ , and AKT at  
170 steady state or following 30 min of EGF stimulation in infected fibroblasts using a EGFR  
171 signaling array (PathScan, Cell Signaling Technologies). At steady state, phosphorylation of  
172 EGFR at T669, Y845, and Y1068 was increased relative to uninfected cells. However, EGFR  
173 was less responsive to EGF stimulation, marked by decreased phosphorylation on T669, Y845,  
174 and Y1068 relative to uninfected, stimulated cells (Fig. S1A). Infection did not alter  
175 phosphorylation of EGFR Y998. While basal activity of MEK1/2, ERK1/2, and AKT was not  
176 altered by infection in unstimulated cells, EGF-stimulated phosphorylation of MEK1/2 (S221 or

177 S217/221, Fig. S1B) and AKT (S473, Fig. S1C) was reduced in infected cells relative to  
178 uninfected cells. CMV infection did not affect phosphorylation and activation of STAT3 (Y705),  
179 PLC $\gamma$ 1 (S1248) or AKT (T308) in response to EGF stimulation (Figure S1C). These results  
180 suggest that MEK/ERK and AKT signaling are the primary pathways downstream of EGFR that  
181 are suppressed by CMV infection.

182

183 To further analyze the inhibition of both AKT and MEK1/2 pathways by CMV, we monitored their  
184 activation over a time course of infection. Serum starved, infected fibroblasts were pulsed with  
185 EGF ligand over a time course following infection (0, 12, 24, 48, and 72 hpi) and cell lysates  
186 were harvested at 0, 15 and 30 minutes following each EGF pulse to analyze the  
187 phosphorylation of EGFR (Y1068), AKT (S473), and MEK1/2 (S217/221) (Fig. 2A). In uninfected  
188 fibroblasts, EGFR, AKT and MEK1/2 phosphorylation was induced by 15 min post EGF  
189 stimulation, as expected. In fibroblasts infected for 12 hours, pEGFR, pAKT, pMEK1/2 induction  
190 was unchanged from uninfected cells. In contrast, the levels of all three phosphorylation  
191 markers decreased significantly after EGF stimulation with a reduction of pMEK1/2 by 24 hpi  
192 and both pEGFR and pAKT by 48 hpi, relative to uninfected fibroblasts (Fig. 2B). By 72 hpi,  
193 pEGFR and pAKT was undetectable in infected cells (Fig. 2A). Induction of pMEK1/2 in  
194 response to EGF stimulation is undetectable relative to basal levels by 24 hpi. Together these  
195 data indicate that EGFR and both the MEK/ERK and PI3K/AKT downstream signaling nodes  
196 become progressively less responsive to stimulation in the productive infection.

197

198 **PI3K/AKT and MEK/ERK pathways suppress viral replication for latency.** Work by the  
199 Chan and Yurochko groups have demonstrated that PI3K signaling is important to survival of  
200 CMV-infected monocytes (10, 25). Further, we previously demonstrated that inhibition of EGFR



201 or PI3K increases CMV replication in fibroblasts and reactivation in CD34<sup>+</sup> hematopoietic  
202 progenitor cells (HPCs) (15). To further investigate how pathways downstream of EGFR impact  
203 CMV replication and latency, we used chemical inhibitors of the MEK/ERK, STAT, PI3K/AKT,  
204 and PLC $\gamma$  pathways. The efficacy of each inhibitor at the chosen concentration was confirmed  
205 by analyzing phosphorylation over a 5 day time course (Fig. S2). Fibroblasts were treated with  
206 inhibitors at 1 day post infection so as not to interfere with viral entry (16, 26, 27) and viral titers  
207 were measured at 8 dpi (Fig. 3A). Inhibition of PI3K (LY294002) or AKT (MK-2206) increased  
208 viral titers by 7.6 and 7-fold, respectively, in comparison to the vehicle control, similar to what  
209 we have previously reported with EGFR inhibition (15). In contrast, inhibition of STAT1  
210 (Fludarabine) or STAT3 (S3I-201) decreased virus production. Loss of viral replication by STAT  
211 inhibition has previously been reported with these and similar inhibitors (28, 29). The  
212 diminishment of virus replication was not related to cytotoxicity, as the monolayers stayed intact.  
213 Inhibition of MEK1/2 (Binimetinib), ERK1/2 (SCH772984), or PLC $\gamma$  (U73122) did not alter virus  
214 titers relative to the vehicle control. These data confirm that PI3K/AKT pathways are  
215 suppressive to virus replication and demonstrate that MEK/ERK and PLC $\gamma$  pathways are  
216 dispensable for productive infection in fibroblasts.

217

218 To determine the importance of the signaling pathways downstream of EGFR to latency and  
219 reactivation, we analyzed the impact of each inhibitor on latency and reactivation in CD34<sup>+</sup>  
220 HPCs.. Infected (GFP<sup>+</sup>) CD34<sup>+</sup> HPCs were isolated by fluorescent activated cell sorting  
221 (FACS) and co-cultured for 10 days in long-term bone marrow cultures using a bone marrow  
222 stromal cell support that has been shown to maintain hematopoietic cell progenitor phenotype  
223 and function (30). This period in long-term bone marrow culture allows for the establishment of  
224 CMV latency. At 10 dpi, half of the cells were seeded by limiting dilution into co-culture with  
225 fibroblasts in a cytokine-rich media to promote myeloid cell differentiation and reactivation. The

226 other half of the culture was lysed and seeded by limiting dilution in parallel onto fibroblasts to  
227 quantify virus formed during the latency period (pre-reactivation) (31). Reactivation resulted in a  
228 2-3 fold increase in the frequency of infectious centers relative to the pre-reactivation control  
229 (DMSO control, Fig. 3B). Inhibition of MEK/ERK with Binimetinib or SCH772984 increased the  
230 frequency of infectious centers by at least 2-fold in both the pre-reactivation and reactivation  
231 condition relative to their respective DMSO control. Inhibition of PI3K (LY294002) induced a 4-  
232 fold increase in infectious centers in the pre-reactivation and an almost 10-fold increase in  
233 infectious centers in the reactivation. Inhibition of AKT (MK-2206) resulted in a loss of latency  
234 with a 10-fold increase in the frequency of infectious centers in the pre-reactivation and a 5.5-  
235 fold increase in the reactivation, relative to DMSO controls. By contrast, inhibition of STAT3 and  
236 PLC $\gamma$  did not significantly alter infectious centers produced prior to or following reactivation  
237 relative to the DMSO controls. Fludarabine was not used in CD34+ HPCs because a non-toxic  
238 dose could not be found. These results indicate that the MEK/ERK and PI3K/AKT pathways  
239 each contribute to the maintenance of CMV latency and inhibition of these pathways enhances  
240 reactivation, while we find no role for STAT3 or PLC $\gamma$ .

241

242 **EGF stimulation drives expression of the *UL138* latency determinant.** Collectively, our work  
243 demonstrates a requirement for EGFR and downstream PI3K/AKT and MEK1/2 signaling  
244 pathways for the suppression of virus replication to maintain latency in CD34+ (Fig. 2B) (15).  
245 However, the mechanisms by which host signaling impacts infection is not know. While the  
246 effect of EGFR signaling on cellular gene expression (32) might impact virus replication and  
247 latency, we hypothesized that EGFR signaling might also impact viral gene expression and,  
248 specifically, the expression of genes required for latency.

249

250 To determine if stimulation of EGFR might affect viral gene expression from the *UL133-UL138*  
251 locus, we monitored expression of the immediate early genes *UL122* and *UL123* (IE2 and IE1,  
252 respectively), *UL135*, and *UL138* in serum starved, infected fibroblasts over a time course  
253 following EGF stimulation (Fig. 4A). *UL138* protein accumulation increased by 75% at 1h  
254 following EGF stimulation relative to unstimulated cells (Fig. 4A). *UL138* protein levels remained  
255 elevated for up to 6h post EGF pulse. In contrast, neither *UL135* nor IE1/2 levels changed in  
256 response to EGF-stimulation.

257

258 To begin to understand how EGFR signaling might affect *UL138* expression, we used  
259 PhysBinder to identify putative transcription factor binding sites within the *UL133-UL138* locus  
260 that are regulated by EGFR signaling (33). To minimize the potential for false positives, we used  
261 the Max Precision setting and identified two binding sites for early growth response factor 1  
262 (EGR1) within the *UL135* open reading frame (ORF) upstream of *UL138* (Fig. 4B). To confirm  
263 binding of EGR1 to these sites, we transduced fibroblasts with lentiviruses expressing EGR1  
264 fused to a 3xFlag epitope tag ( *EGR1<sub>3xFlag</sub>*) and infected the cells with either a wild-type or a  
265 *UL133/8* deletion mutant (negative control; NC) TB40/E viruses. At 48 hpi, samples were  
266 processed for chromatin immunoprecipitation (SimpleChIP ,Cell Signaling Technologies) with  
267 normal IgG or antibodies to either EGR1 or Histone 3 (H3) and binding was detected by PCR  
268 with site-specific primers (Fig. 4C). The EGR1 antibody precipitated sequences in the wild-type  
269 infection for both binding sites by PCR; but not in the NC or IgG control. These results indicate  
270 that EGR1 interacts with both site 1 and site 2. Interesting, both PI3K/AKT and MEK/ERK  
271 pathways induce EGR1 (34-36)(Fig. 4D). EGR-1 is of particular interest because it is highly  
272 expressed in hematopoietic cells, a site of CMV latency (21, 37). EGR1 is required to maintain  
273 stem cell quiescence and retention in the bone marrow and must be downregulated for  
274 hematopoietic differentiation and migration out of the bone marrow. Therefore, we hypothesized

275 that EGR1 might stimulate the transcription of RNAs encoding *UL138* that we previously  
276 mapped to initiate downstream of the *UL135* ORF (38-40). The presence of putative EGR1  
277 binding sites upstream of these transcripts suggests the existence of a promoter element in this  
278 region to regulate *UL138* expression; this element has not been mapped yet. In this case, EGR1  
279 binding would be expected to induce *UL138*, but not *UL135* gene expression, consistent with  
280 our result in Figure 4A.

281

282 To determine if EGR1 is sufficient to induce *UL138* expression we transduced fibroblasts with  
283 lentivirus expressing either EGR1<sub>3xFlag</sub> or empty vector and infected cells with TB40/E. EGR1  
284 overexpression increased *UL138* expression in infected cells by 4-fold, while IE 1 and 2 proteins  
285 were unaffected (Fig. 4E). To ensure that EGR1 activity is not priming *UL138* expression from a  
286 more distal promoter site, we co-transfected HEK-293T cells with a plasmid containing the  
287 entire *UL133-UL138* locus in a promoterless vector backbone (*UL133/8*) and either the  
288 EGR1<sub>3xFlag</sub> expression construct or an empty control. *UL138* can be expressed from this vector  
289 due to the presence of an IRES upstream of *UL138* (38) however, *UL138* protein levels  
290 increased 3.5-fold in cells overexpressing EGR1 relative to the empty vector control (Fig. 4F).  
291 These results indicate that EGR1 expression is sufficient to stimulate *UL138* expression from an  
292 unmapped regulatory element encoded with the *UL133/8* locus.

293

294 Mikell et al. have identified a CMV micro RNA transcribed within the US22 open reading frame  
295 (miR-US22) that targets EGR1, resulting in a 2 to 5-fold decrease in EGR1 protein levels  
296 depending on cell type and is required for reactivation (41). A miR-US22-mutant ( $\Delta$ US22) virus  
297 results in increased expression of EGR1 and fails to reactivate. We hypothesized  $\Delta$ US22 would  
298 also have increased expression of *UL138*. To test this, we infected fibroblasts with a wild type or

299  $\Delta$ US22-mutant TB40/E virus and pulsed them with EGF for 1 hour at different time points (Fig.  
300 4G). At both 3 dpi and 4 dpi, UL138 was increased by ~25% in the  $\Delta$ US22-mutant virus  
301 infection relative to WT infection. The increase in UL138 protein levels corresponded to  
302 increased EGR1 protein levels in the context of  $\Delta$ US22 virus infection. This result indicates that  
303 UL138 gene expression is induced by EGFR signaling through the induction of EGR1 and  
304 suggests an epistatic relationship between UL138 and US22 and EGR1 in regulating infection.

305

306 **CMV maintains EGR1 levels during latent infection, but reduces its expression during**  
307 **productive replication.** To determine how EGR1 is regulated during CMV latent infection, we  
308 analyzed EGR1 mRNA expression in TB40/E-infected CD34<sup>+</sup> HPCs derived from two donors at  
309 2 and 6 dpi by RNA sequencing (2). In each donor, EGR1 expression increased following CMV  
310 infection from 2 to 6 dpi by 3-fold (Fig. 5A). By contrast, the expression of two related genes  
311 belonging to the same zinc-finger transcription factor family, EGR2 and EGR3, were unchanged  
312 by CMV infection. Additionally, CMV did not affect expression of Wilms tumor 1 (WT1) a factor  
313 that binds competitively to the EGR1 consensus sequence to antagonize EGR1 transcriptional  
314 control of genes, including EGFR (42, 43). By contrast, EGR1 is suppressed 3-fold during  
315 replication in fibroblasts following an initial induction (Fig. 5B) that is likely due to the stimulation  
316 of EGFR at the cell surface during viral entry (16, 44). Further, EGR1 is strongly induced in  
317 serum starved, uninfected fibroblasts and infection diminishes this induction by 7-fold (Fig. 5C).  
318 The lack of responsiveness of EGR1 to EGF stimulation in infected cells likely reflects  
319 diminished EGFR levels and signaling in the context of infection beginning at 24 hpi (Figs. 1 and  
320 2). These findings are consistent with the differential regulation of EGFR during productive and  
321 latent states of viral infection which we previously described (15).

322

323 **EGR1 binding in the UL133-UL138 region induces UL138 protein accumulation.** To

324 validate the EGR1 binding sites upstream of *UL138*, we introduced silent mutations into wobble  
325 codons within site 1 or site 2 by site directed mutagenesis in the promoterless *UL133/8* vector to  
326 generate  $\Delta$ Site 1 or  $\Delta$ Site 2 constructs. HEK-293T cells were co-transfected with an empty  
327 vector or EGR1-Flag expression vector (EGR1<sub>3xFLAG</sub>) and either WT *UL133/8* or  $\Delta$ Site 1 or  $\Delta$ Site  
328 2. UL138 protein levels in cells expressing EGR1<sub>3xFlag</sub> were normalized to that in cells  
329 transfected with empty vector (Fig. 6A). EGR1 overexpression induced UL138 protein  
330 accumulation 4-fold from the WT *UL133/8* construct; however mutation of either Site 1 or Site 2  
331 resulted in 2-fold reduces levels of *UL138* protein.

332

333 To further validate the role of the EGR-1 binding sites in regulating *UL138* expression, we  
334 analyzed UL138 protein levels in HEK 293T cells transfected with the WT *UL133/8* or  $\Delta$ Site1+2  
335 promoterless vectors and EGR1 siRNAs or miR-US22 to knocked down EGR1 (Fig. 6B).  
336 Knockdown of EGR1 either with the EGR1 siRNA or miR-US22 decreased UL138 protein levels  
337 by 30% in cells containing the wild-type *UL133/8* plasmid. However, EGR1 knockdown had no  
338 effect on UL138 protein accumulation in cells where site 1 and site 2 was disrupted. Taken  
339 together, these results indicate the importance of EGR1 binding sites to EGR1-mediated  
340 induction of *UL138* expression.

341

342 We next engineered the EGR1 binding site disruptions into the TB40/E genome cloned as a  
343 bacterial artificial chromosome, resulting in TB40/E- $\Delta$ EGR1<sub>Site 1</sub> and TB40/E- $\Delta$ EGR1<sub>Site 2</sub>. We  
344 confirmed the disruption of EGR1 binding sites by sequencing (Fig. S3). We evaluated each  
345 virus for its ability to replicate in fibroblasts by multi-step growth curves. Each virus replicated  
346 with wild-type kinetics and to wild type titers (Fig. 7A), indicating that the mutations introduced to

347 disrupt EGR1 binding to the *UL133-UL138* region do not affect productive virus replication in  
348 fibroblasts.

349

350 To determine if either EGR1 binding site mutation affected *UL138* expression in the context of  
351 infection, we infected fibroblasts with TB40/E-WT,  $\Delta$ EGR1<sub>Site 1</sub> or  $\Delta$ EGR1<sub>Site 2</sub>, and measured  
352 UL138, UL135, and IE1/IE2 protein levels at 48 hpi by immunoblot (Fig. 7B). Disruption of Site  
353 1, but not Site 2, decreased *UL138* protein levels by 50%. While, IE protein levels were  
354 unaffected, we detected a profound loss of UL135 protein in the TB40/E- $\Delta$ EGR1<sub>Site 2</sub> infection.  
355 This loss was evident in multiple independent clones of this virus. Given the importance of  
356 UL135 on reactivation (18), we moved forward with only the TB40/E- $\Delta$ EGR1<sub>Site 1</sub> mutant virus.

357

358 To confirm the loss of EGR1 binding to  $\Delta$ EGR1<sub>Site 1</sub> in the context of infection, we transduced  
359 fibroblasts with EGR1<sub>3xFLAG</sub> lentivirus and infected with either WT or TB40/E- $\Delta$ EGR1<sub>Site 1</sub> mutant  
360 virus. EGR1 was immunoprecipitated (SimpleChIP, Cell Signaling Technologies) and binding to  
361 site 1 was quantified by qPCR using primers flanking site 1. EGR1 precipitated 50-fold more site  
362 1 sequence in the WT-virus infection relative to the IgG control (Fig. 7C). Infection with TB40/E-  
363  $\Delta$  EGR1<sub>Site 1</sub> resulted in a 4-fold reduction in EGR1 binding relative to wild-type. We also  
364 analyzed binding of endogenous EGR1 to Site 1 in fibroblasts infected with either TB40/E-WT or  
365 TB40/E- $\Delta$ EGR1<sub>Site 1</sub> and stimulated with EGF for 1h to induce EGR1 (Fig. 7D). As in Figure 7C,  
366 EGR1 binding to site 1 was increased 4-fold relative to IgG control and was reduced nearly 4-  
367 fold in TB40/E- $\Delta$  EGR1<sub>Site 1</sub> infection relative to . Taken together, these data demonstrate that  
368 disruption of the EGR1 binding site 1 in the *UL133/8* regions disrupts EGR1 binding and EGR1-  
369 mediate induction of *UL138* expression.

370

371 **EGR1-stimulation of UL138 is required for CMV latency.** To determine if EGR1 binding is  
372 important for CMV latency we infected CD34<sup>+</sup> HPCs with either TB40/E-WT or TB40/E-  
373  $\Delta$ EGR1<sub>Site 1</sub> mutant virus. At 24 hpi, pure populations of infected HPCs (GFP<sup>+</sup>CD34<sup>+</sup>) were  
374 isolated and seeded into transwells above a stromal cell support for long-term culture. After 10  
375 days of long-term culture, the cultures were split and half were mechanically lysed. We then  
376 seeded the lysate or live cells by limiting dilution in parallel onto fibroblasts. GFP<sup>+</sup> wells were  
377 scored 14 days later to determine the frequency of infectious centers present at the time of lysis  
378 (pre-reactivation) or resulting from reactivation, as described for Figure 3B. Reactivation of  
379 TB40/E-WT produced a 3-fold increase in the frequency of infectious centers relative to the pre-  
380 reactivation control (Fig. 8). In contrast, TB40/E- $\Delta$ EGR1<sub>Site 1</sub> infection resulted in a loss of  
381 latency and equal frequencies of infectious centers were measured prior to and following  
382 reactivation. The loss of latency with the TB40/E- $\Delta$ EGR1<sub>Site 1</sub> mutant is a similar phenotype as a  
383 *UL138<sub>null</sub>* mutant virus in CD34<sup>+</sup> HPCs (18). While the cell numbers required for immunoblots of  
384 viral proteins is prohibitive, the loss of latency phenotypes are consistent with diminished  
385 expression of *UL138*. Further, these results are consistent with our finding that inhibition of  
386 EGFR, PI3K, or ERK1/2 signaling promotes the reactivation of viral replication (Fig. 3B).

387

## 388 **DISCUSSION**

389 To regulate the establishment of latency and the reactivation of replication, all herpesviruses  
390 rely on and manipulate cellular signaling pathways to regulate their viral lifecycle. CMV targets  
391 and manipulates EGFR and its downstream pathways to achieve this goal (11, 13, 15, 19, 24,  
392 26). Stimulation of EGFR signaling upon entry into hematopoietic cells is important to establish  
393 an environment to support latency in CD34<sup>+</sup> HPCs (10, 16, 45). While EGFR is downregulated  
394 during the replicative cycle, targeting EGFR provides CMV with access to cellular processes



395 involved in differentiation, proliferation, motility, immune signaling, and DNA repair (46-50). By  
396 incorporating EGFR signaling into CMV entry, latency, and reactivation of viral replication the  
397 virus maintains a firm grasp on the receptor and its signaling cascades (13). From the findings  
398 of this study, we propose a model whereby EGFR signaling through MEK/ERK and PI3K/AKT  
399 pathways drives *UL138* expression through the induction of EGR1 to suppress viral replication  
400 for latency (Fig. 9). As such, the high levels of EGR1 in CD34<sup>+</sup> HPCs likely primes these cells for  
401 expression of *UL138* upon infection and the establishment of latency upon infection (21).  
402 Combined with our previous findings that *UL138* maintains EGFR surface levels (15), we  
403 propose a model by which EGFR and *UL138* form a positive feedback loop to promote and  
404 maintain CMV latency. By disrupting the feedback loop, with either chemical inhibitors or  
405 preventing EGR1 binding, the virus is unable to maintain latency and replicates. We have  
406 previously shown that UL135 opposes UL138 in targeting EGFR for turnover and reactivation  
407 (15, 19). Here, we demonstrate that CMV miR-US22 also counteracts UL138 regulation of  
408 EGR1 by targeting EGR1.

409

410 We demonstrate that EGFR activation of the MEK/ERK and PI3K/AKT signaling axes regulates  
411 gene expression of *UL138* through EGR1 binding to an unmapped element in the *UL133-UL138*  
412 locus that stimulates the expression of *UL138*, which in turn suppresses virus replication for  
413 latency. PI3K/AKT and MEK/ERK signaling pathways are common targets in herpesvirus  
414 infection and their sustained signaling maintains latency. Herpes simplex virus 1 (HSV-1)  
415 activates PI3K activity through stimulation of neural growth factor to maintain persistence (51).  
416 Inhibition of P13K stimulates HSV-1 reactivation, but full reactivation also requires c-Jun N-  
417 terminal kinase (JNK), a MAPK family member, signaling to induce histone phosphorylation on  
418 viral promoters to de-repress HSV-2 gene expression (52). Also, HSV-1 proteins VP11/12  
419 interact with Src-family kinases, Grb2, Shc, and p85 through a tyrosine-binding motif in order to

420 stimulate PI3K/AKT activity without growth factor stimulation (53). Additionally, HSV-1 US3  
421 protein kinase suppresses ERK signaling to promote viral replication (54). Epstein-Barr virus  
422 (EBV) latency membrane protein-1 (LMP-1) promotes both EGFR protein levels and activation  
423 of STAT3 and ERK signaling pathways (55-57), while LMP-2A activates PI3K/AKT signaling  
424 (58, 59). Additionally, LMP-2A also promotes cellular survival through ERK activation mediating  
425 proteosomal degradation of proapoptosis mediator Bim (60). Lastly, Kaposi's sarcoma-associated  
426 herpesvirus (KSHV) latent infection promotes AKT/PI3K activation (61). However, in contrast to  
427 CMV infection, KSHV activates MEK/ERK signaling to promote its reactivation and inhibition of  
428 MEK/ERK signal suppresses ORF50 expression and KSHV reactivation (62, 63). These  
429 combined findings illustrate the significance of PI3K/AKT and MEK/ERK signaling pathways to  
430 the regulation of herpesvirus programs of latency and replication.

431

432 EGR1 induces *UL138* gene expression, but our results indicate that *UL138* is not dependent on  
433 EGR1. *UL138* is expressed from the 3' end of a series of polycistronic transcripts encoded  
434 within the *UL133-UL138* locus and differ only in their 5' ends (38, 40). Therefore, while EGR1  
435 contributes to heightened *UL138* expression under specific contexts of infection in the cell, there  
436 are other mechanism that allow for constitutive or inducible *UL138* expression. One additional  
437 contributor to *UL138* expression is an IRES element that overlaps the UL136 ORF. This  
438 element is upstream of the EGR1 binding sites and stimulates downstream *UL138* gene  
439 expression from long polycistronic transcripts (38, 40). Therefore, multiple transcription and  
440 translational regulatory mechanisms control the expression of *UL138*.

441

442 The role of EGR1 in promoting *UL138* expression during CMV infection (Fig. 4 and Fig. 6) is  
443 particularly intriguing because CD34<sup>+</sup> HPCs express high levels of EGR1 during maintenance in

444 the bone marrow (21). As such, CD34<sup>+</sup> cells are predisposed to promote *UL138* expression  
445 upon CMV infection to suppress viral replication. This observation is one explanation for why we  
446 have only detected UL138 protein, but not other UL133-UL138 proteins, in latently infected  
447 CD34<sup>+</sup> HPCs (39). Upon differentiation of CD34<sup>+</sup> HPCs EGR1 expression is abolished (21), a  
448 requirement for the differentiation and migration of stem cells out of the bone marrow.  
449 Therefore, decreased level of UL138 as a result of diminished EGR1 combined with myeloid  
450 differentiation, which would predispose the cells towards reactivation. By contrast, EGR1 levels  
451 are low in sites of productive replication, such as fibroblasts. CMV-mediated suppression of  
452 EGFR, MEK/ERK and PI3K/AKT signaling would result in the further suppression of EGR1  
453 expression for replication (Fig. 2 and 5C). Additionally, the CMV miRNA, miR-US22, targets  
454 EGR1 messages and is necessary for the reactivation from latency(41). In collaboration with the  
455 Nelson group, we show that miR-US22 targeting of EGR1 reduces *UL138* expression. Finally,  
456 CMV replication in fibroblasts stimulates WT1 expression (24), which competes antagonistically  
457 for EGR1 targets, including EGFR (42, 64), and indicates another mechanism by which the virus  
458 antagonizes EGFR/EGR1 signaling for productive infection. Taken together, our results  
459 demonstrate that EGR1 is an important target in CMV infection and its expression is targeted  
460 through multiple mechanisms to promote viral replication.

461

462 EGR1 regulates viral gene expression in the context of other herpesvirus infections. In HSV-1,  
463 EGR1 binding sites are located within the introns for both ICP22 and ICP4 (65). In contrast to  
464 our findings, EGR1 inhibits both ICP4 and ICP22 by blocking SP1 binding sites and recruiting  
465 the co-repressor Nab2 (65). The authors predict that the inhibition of both of these immediate  
466 early genes would promote HSV-1 gene silencing for the establishment of latency. In further  
467 contrast to CMV, during KSHV infection glycoprotein B suppresses ERK1/2 signaling to  
468 decrease expression of ORF50 to promote the establishment of latency(63). Similar to KHSV,

469 EBV transactivator ZTA upregulates EGR1 by both interacting with its promoter and by  
470 increasing ERK signaling in order to promote viral reactivation(66). While the mechanism by  
471 which each herpesvirus utilizes EGR1 to control viral latency and replication differs, it is clear  
472 that manipulating EGR1 is common feature. These differences may reflect the unique cell types  
473 where each herpesvirus establishes latency.

474

475 Herpesviruses manipulate multiple signaling pathways to control viral latency and to promote  
476 viral replication, and understanding the complex interplay between these signaling pathways  
477 and the virus is necessary to fully appreciate how these viruses persist. We have shown that  
478 viral manipulation of host signaling impacts the control of viral transcription. Putative EGR1  
479 binding sites exist throughout the CMV genome and, because EGR1 can either promote or  
480 repress gene expression (64, 67), it will be important to understand how EGR1 binding to  
481 promoters across the genome impact latent and replicative states of infection.

482

## 483 **MATERIALS AND METHODS**

484 **Cells.** MRC-5 lung fibroblasts (ATCC), HEK293T/17 cells (ATCC), SI/SI stromal cells (Stem Cell  
485 Technology) , M2-10B4 stromal cells (Stem Cell Technology), and CD34<sup>+</sup> HPCs were  
486 maintained as previously described (18). Human CD34<sup>+</sup> HPCs were isolated from de-identified  
487 medical waste following bone marrow isolations from healthy donors for clinical procedures at  
488 the Banner-University Medical Center at the University of Arizona. Latency assays were  
489 performed as previously described (15, 18).

490

491 **Viruses.** Bacterial artificial chromosome (BAC) stocks of TB40/E WT virus expressing GFP  
492 from a SV40-promoter was provided as gift from the Szinger lab (22). EGR1 binding mutant  
493 viruses were created by two-step, positive-negative selection approach with galk substitution as  
494 was previously described (18, 68). Both the TB40/E *UL133/8<sub>Null</sub>* galk intermediate and pGEM-T  
495 *UL133-UL138* shuttle vector, referred to as *UL133/8* plasmid in the results, were created  
496 previously and described in Umashankar et al. 2014 (18). EGR1 binding sites were mutated by  
497 Phusion PCR mutagenesis using flanking PCR primers to each region with mutations  
498 incorporated into the corresponding forward and reverse primers (Table 1). pGEM-T *UL133-*  
499 *UL138* plasmids removing EGR1 site 1 ( $\Delta$ Site 1), EGR1 site 2 ( $\Delta$ Site 2), or both EGR1 sites  
500 ( $\Delta$ Site 1+2) were created and stocks were maintained in DH10B bacteria glycerol stocks.  
501 Inserts for BAC recombineering were gel purified from pGEM-T  $\Delta$ Site 1 and  $\Delta$ Site 2 plasmids  
502 digested with EcoRI. Inserts were electroporated into SW102 *E. coli* containing the TB40/E  
503 *UL133/8<sub>Null</sub>* galk intermediate as previously described (69). BAC integrity was confirmed by  
504 comparing EcoRV digestion of the EGR1 binding site mutant BACs to wild type TB40/E BAC  
505 digest. Mutations of EGR1 binding sites in TB40/E- $\Delta$ EGR1<sub>Site 1</sub> and TB40/E- $\Delta$ EGR1<sub>Site 2</sub> were  
506 confirmed by Sanger sequencing. Loss of EGR1 binding in TB40/E- $\Delta$ EGR1<sub>Site 1</sub> was confirmed  
507 by ChIP-qPCR, described below. TB40/E<sub>GFP</sub> $\Delta$ miR-US22 was created as described in Mikell et  
508 al. (41).

509

## 510 **Table 1 Primer sequences**

| <b>Primer</b>           | <b>Sequence</b>                                             |
|-------------------------|-------------------------------------------------------------|
| $\Delta$ Site 1 Forward | 5'- [phos]CCAACCCCGCAGGTGCCGCG-3'                           |
| $\Delta$ Site 1 Reverse | 5'-[ [phos]GGGGTGGGTGCCACC-3'                               |
| $\Delta$ Site 2 Forward | 5'- [phos]CACCCCGATGGTCGGACATCGAGG-3'                       |
| $\Delta$ Site 2 Reverse | 5'- [phos]GGGGGGCTAACTCGGAAACCG-3'                          |
| pCIG3 EGR1 Forward      | 5'- ATCGATCGGAATTCCACCATGGCCGCGCCAAGGCC-3'                  |
| pCIG3 EGR1 Reverse      | 5'- GCATGCATTTAATTAATCAGCAAATTTCAATTGTCCTGGGAGAAAAGGTTGC-3' |

|                         |                                                                                  |
|-------------------------|----------------------------------------------------------------------------------|
| EGR1 3xFlag Forward     | 5'-[phos]AAGATCATGACATCGATTACAAGGATGACGATGACAAGTGATTAATTAAGGG<br>GATCCGCCCTCT-3' |
| EGR1 3xFlag Reverse     | 5'- [phos]TATAATCACCGTCATGGTCTTTGTAGTCGCCGCCGCCGCCGCAAATTTCAAT<br>TGTCTGGGAGA-3' |
| EGR1 RT-qPCR<br>Forward | 5'-AGCCCTACGAGCACCTGAC-3'                                                        |
| EGR1 RT-qPCR<br>Reverse | 5'-GGGCAGTCGAGTGGTTTG-3'                                                         |
| EGFR RT-qPCR<br>Forward | 5'-CATGTCGATCGACTTCCAGA-3'                                                       |
| EGR1 RT-qPCR<br>Reverse | 5'-GGGACAGCTTGGATCACACT-3'                                                       |
| H6PD RT-qPCR<br>Forward | 5'-GGACCATTACTTAGGCAAGCA-3'                                                      |
| H6PD RT-qPCR<br>Forward | 5'-CACGGTCTCTTTCATGATGATCT-3'                                                    |
| Site 1 ChIP Forward     | 5'- CGCCGACGGAGCCGA-3'                                                           |
| Site 1 ChIP Reverse     | 5'- TGCACCGCCTTTTCCAAGAGTTC-3'                                                   |
| Site 2 ChIP Forward     | 5'- AATCTCTCGAAGGTGGGACTCT-3'                                                    |
| Site 2 ChIP Reverse     | 5'- CTCGGAACCGACACGATAGG-3'                                                      |

511

512 **Plasmids and Lentiviruses.** pDONR221 containing EGR1 cDNA was purchased from DNASU  
513 (Arizona State University; Phoenix, Az). EGR1 was PCR amplified from the pDONR221 plasmid  
514 with pCIG3 EGR1 forward and reverse primes and inserted into pCIG3 plasmid at PacI and  
515 EcoRI digestion sites. Addition of a 3xFlag epitope tag was done by Phusion PCR mutagenesis  
516 EGR1 3xFlag Forward and Reverse primers EGR1<sub>3xFlag</sub> Forward and Reverse sequences. All  
517 plasmid inserts were verified through Sanger sequencing and maintained in DH10B glycerol  
518 stocks. EGR1<sub>3xFlag</sub> lentivirus was created by cotransfecting pCIG3 EGR1<sub>3xFLAG</sub>, pMD2.G, and  
519 psPAX2 (Addgene #12259 and 12260; Trono Lab) into HEK293T/17 cells with polyethylenimine  
520 (Polysciences) and collected supernatants at 48 and 72h post transfection. Plasmid  
521 transfections were carried out in HEK293T/17 cells using PEI at 1 µg of DNA to 3 µg PEI.  
522 Plasmid encoding shRNA of EGR1 was described in Mikell et al. (41).

## 523 **Table 2 Antibody description and Sources**

| Antibody | Species | Source | Concentration |
|----------|---------|--------|---------------|
|----------|---------|--------|---------------|

---

|                                                          |        |                                 |                                                            |
|----------------------------------------------------------|--------|---------------------------------|------------------------------------------------------------|
| Alexa Fluor 546 anti rabbit                              | goat   | Molecular Probes                | IF: 1:7,000                                                |
| Alexa Fluor 647 anti mouse                               | goat   | Molecular Probes                | IF: 1:7,000                                                |
| Brilliant Violet 421 EGFR                                | mouse  | BioLegend                       | Flow 5 $\mu$ L/ $1 \times 10^6$ cells                      |
| Dylight 700 conjugated anti mouse                        | goat   | Pierce                          | Western: 1:12,000                                          |
| Dylight 800 conjugate anti rabbit                        | goat   | Pierce                          | Western: 1:12000                                           |
| EGFR (D38B1)                                             | rabbit | Cell Signaling                  | Western 1:10,00; IF 1:50                                   |
| EGR1 (44D5)                                              | Rabbit | Cell Signaling                  | Western 1:1,000;<br>ChIP 10 $\mu$ L/ $4 \times 10^6$ cells |
| EGR1                                                     | rabbit | Bethyl                          | Western 1:1,000                                            |
| Flag (D655B)                                             | rabbit | Cell Signaling                  | Western 1:1,000                                            |
| GAPDH (6C5)                                              | mouse  | Abcam                           | Western 1:15,000                                           |
| HRP anti-mouse                                           | goat   | Jackson ImmunoResearch          | Western: 1:5000                                            |
| HRP anti-rabbit                                          | goat   | Jackson ImmunoResearch          | Western: 1:5000                                            |
| IE1 (8B1.2)                                              | mouse  | Milipore Sigma                  | Western: 1:40,000                                          |
| IE1/2 (3H4)                                              | mouse  | Tom Shenk; Princeton University | Western 1:1,000                                            |
| IE2                                                      | mouse  | Tom Shenk; Princeton University | IF 1:50                                                    |
| IgG, Normal                                              | rabbit | Cell Signaling                  | ChIP 2 $\mu$ g/ $4 \times 10^6$ cells                      |
| Histone H3 (D2B12)                                       | rabbit | Cell Signaling                  | ChIP 10 $\mu$ L/ $4 \times 10^6$ cells                     |
| PE conjugated CD34                                       | mouse  | BD Biosciences                  | Flow 20 $\mu$ L/ $1 \times 10^6$ cells                     |
| phospho-AKT (S473; D9E)                                  | rabbit | Cell Signaling                  | Western 1:2000                                             |
| phospho-EGFR (Tyr1068; D7A5)                             | rabbit | Cell Signaling                  | Western 1:1000                                             |
| phospho-p44/42 MAPK (ERK1/2) (Thr202/Tyr204) (D13.14.4E) | rabbit | Cell Signaling                  | Western 1:2000                                             |
| phospho-MEK1/ (S217/221; 41G9)                           | mouse  | Cell Signaling                  | Western 1:2000                                             |
| UL135                                                    | rabbit | Open Biosystems <sup>a</sup>    | Western 2 $\mu$ g/mL                                       |
| UL138                                                    | rabbit | Open Biosystems <sup>a</sup>    | Western 2 $\mu$ g/mL                                       |
| $\alpha$ -Tubulin (DM1A)                                 | mouse  | Sigma                           | Western 1:10000                                            |

<sup>a</sup> Custom Ordered antibody

524

525 **Flow Cytometry.** MRC-5 fibroblasts were infected with 1 MOI of TB40/E<sub>GFP</sub> virus for 0-72 hpi.

526 Cells were lifted off the plates, fixed in 2% Formaldehyde in PBS for 30 min, and washed with

527 excess PBS. Cells were then stained with Brilliant Violet 421-conjugated ms  $\alpha$ -EGFR

528 (Biolegend; Table 2). Samples were gated for intact GFP<sup>+</sup> cells and geometric mean of

529 fluorescence intensity (geoMFI) was measured using a BD LSRII equipped with FACSDiva

530 Software (BD Bioscience Immunocytometry Systems) and FlowJo software.

531

532 **Immunoblotting.** Lysates were separated by electrophoresis on precast 12% Tris-Bis SDS-  
533 PAGE gel (Genscript) or 4-20% precast gels (BioRad). Gels were transferred onto Immobilon-P  
534 PVDF membrane (EMD Millipore). Antibodies were incubated in with blocking solution as well.  
535 After antibody staining, blots were incubated with fluorescent secondary antibodies and imaged  
536 and quantitated using a Li-Cor Odyssey CLx infrared scanner with Image Studio software.  
537 Antibodies and sources are defined in Table 2. US22 experiments were developed using  
538 chemiluminescence with film and quantified with Image J software.

539

540 **RT-qPCR.** Cells were infected with 1 MOI of TB40/E<sub>GFP</sub> and RNA was isolated using Quick-  
541 DNA/RNA miniprep kit (Zymo Research) from 0-72 hpi. RNA was reverse transcribed into cDNA  
542 using Transcriptor First Strand cDNA Synthesis Kit (Roche). cDNA for EGR1, EGFR, and H6PD  
543 was quantified using LightCycler SYBR Mix kit (Roche) and corresponding primers (Table 1).  
544 Assays performed on Light Cycler 480 and corresponding software.  $\Delta$ CT for EGR1 and EGFR  
545 were calculated by Pfaffl method normalized to H6PD (70).

546

547 **Immunofluorescence.** Samples were processed as previously described and stained with  
548 antibodies (Table 2; (71)). All images were obtained using a DeltaVision RT inverted  
549 Deconvolution microscope. Representative single plane images were adjusted for brightness  
550 and contrast.

551

552 **EGF Pulse.** Uninfected or cells infected with wild type or mutant TB40/E<sub>GFP</sub> virus were washed  
553 two time with PBS and serum starved in serum-free media for 24h prior to EGF stimulation.  
554 After serum starvation, cells were washed with ice cold PBS and incubated on ice for 30 min.



555 Cells were then incubated on ice with serum free media containing 10 nM EGF (Gold  
556 Biotechnology) for 30 min, except for no EGF control. Cells were then washed with ice cold  
557 PBS. 37°C serum free media was added and samples were incubated at 37°C for 15min to 24h,  
558 depending on experiment. Samples were then collected for immunoblotting or chromatin  
559 immunoprecipitation, depending of experiment.

560

561 **siRNA knockdown.** HEK293T cells, seeded into 12-well plates the day before, were co-  
562 transfected with the indicated 400ng pGEMT plasmid and 600ng pSiren plasmid per well using  
563 Lipofectamine 2000 (Invitrogen). 24 h later, the cells were serum starved overnight in 0% FBS  
564 DMEM and then treated with 50 ng/mL EGF (Cell Guidance Systems) for 1 hour. Cells were  
565 harvested in protein lysis buffer (50mM Tris-HCl pH 8.0, 150mM NaCl, 1% NP-40, and protease  
566 inhibitors). The experiment was performed in duplicate.

567

568 **Measurement of infectious virus.** Confluent fibroblasts were infected with either 1 MOI or 0.02  
569 MOI of either wild type TB40/E<sub>GFP</sub> or EGR1 mutant virus (TB40/E- $\Delta$ EGR1<sub>Site 1</sub> and TB40/E-  
570  $\Delta$ EGR1<sub>Site 2</sub>). For pathway inhibitors, the media was changed 24 hpi with media containing  
571 inhibitor and incubated for 8 days. For EGR1 mutant virus studies, media was changed 24 hpi  
572 and samples were collected up to 16 dpi. Both cells and media were collected and then total  
573 virus was quantified by the TCID<sub>50</sub> (18). Infectious centers were quantitated in CD34<sup>+</sup> HPCs, as  
574 described previously (71). Frequency of infection centers were calculated using extreme limiting  
575 dilution analysis (72). For pathway inhibitors, CD34<sup>+</sup> HPCs were treated with chemical inhibitors  
576 after sorting for CD34<sup>+</sup> GFP<sup>+</sup> populations. Inhibitor concentration, targets, and sources are listed  
577 in Table 3.

578

579 **Table 3 Chemical Inhibitors**

| Inhibitor   | Target       | Source          | Concentration |
|-------------|--------------|-----------------|---------------|
| Binimetinib | MEK1/2       | LC Laboratories | 1 $\mu$ M     |
| SCH772984   | ERK1/2       | Selleckchem     | 125 nM        |
| Fludarabine | STAT1        | Selleckchem     | 50 $\mu$ M    |
| S3I-201     | STAT3        | Selleckchem     | 100 $\mu$ M   |
| LY294002    | PI3K         | LC Laboratories | 20 $\mu$ M    |
| MK-2206     | AKT          | Selleckchem     | 1.25 $\mu$ M  |
| U73122      | PLC $\gamma$ | Selleckchem     | 4 $\mu$ M     |

580

581 **Next Generation sequencing analysis.** Transcript data was acquired from a previous study  
582 conducted by Shu et al. (2). Briefly, they prepared mRNA libraries were prepared from CD34<sup>+</sup>  
583 HPCs infected with TB40/E<sub>GFP</sub> at a MOI of 2 at 2 and 6 dpi. Transcripts for EGR1, EGR2,  
584 EGR3, and WT1 were normalized to fragments per kilobase per million reads (FPKM) and then  
585 normalized to EGR1 levels at 2 dpi. Data from two independent experiments using different  
586 donors were combined and graphed together.

587

588 **ChIP-qPCR.** For EGR1 overexpression chromatin immunoprecipitation coupled with qPCR  
589 (ChIP-qPCR), MRC-5 fibroblasts were transduced with 1 MOI of EGR1<sub>3xFLAG</sub> lentivirus.  
590 Transduced cells were then infected with 1 MOI of either wild type TB40/E<sub>GFP</sub> or TB40/E-  
591  $\Delta$ EGR1<sub>Site 1</sub> for 48h and then processed for ChIP. In EGF pulse ChIP-qPCR, fibroblasts were  
592 infected with 1 MOI of either wild type TB40/E<sub>GFP</sub> or TB40/E- $\Delta$ EGR1<sub>Site 1</sub> and then serum starved  
593 at 24 hpi. At 48 hpi, samples were pulsed with 10 nM EGF for 1h. All samples were then  
594 processed for ChIP-qPCR using SimpleChIP Enzymatic Chromatin IP Kit (Cell Signaling  
595 Technologies) as per manufacturer's recommended protocol. ChIP was carried out using rb  $\alpha$ -  
596 EGR1, rb  $\alpha$ -Histone H3 (positive control), and Normal rabbit IgG (negative control) and with 4 x  
597 10<sup>6</sup> infected cells per reaction (Table 1). PCR was performed with primers specific to EGR1  
598 binding site 1 and site 2 in the *UL135* open reading frame and separated on 2% agarose gel

599 with ethidium bromide (Table 2). qPCR was performed with LightCycler SYBR Mix kit (Roche)  
600 and Site 1 Forward and Reverse primers. Relative expression was calculated against a 2%  
601 input control ( $Relative\ expression = 0.02 \times 2^{(CT_{2\% input} - CT_{ChIP})}$ ). Samples were then normalized  
602 to the relative expression of the WT EGR1 ChIP.

603

604 **Pathscan Antibody Array.** MRC-5 fibroblasts were infected at an MOI of 1 with TB40/E<sub>GFP</sub>  
605 virus and incubated for 48h. After 48h, samples were washed with PBS twice and either lysed to  
606 measure steady state phosphorylation or pulsed with 10 nM of EGF for 30 min and then lysed to  
607 measure phosphorylation post stimulation. Phosphorylation levels were measured using the  
608 PathScan EGFR Signaling Antibody Array Kit from Cell Signaling as per manufacturer  
609 recommended protocol using protein lysates at a concentration of 1 mg/ml. Arrays were  
610 analyzed us a LiCOR Odyssey scanner at a resolution of 42µm, high quality setting, and  
611 exposure intensity of 1. Phosphorylation levels were normalized to uninfected, no EGF  
612 treatment.

613

614 **Statistical Analysis:** All statistics were calculated using GraphPad Prism version 7 software.  
615 Statistics for experiments in this study were calculated using either Student T-test or analysis of  
616 variance (ANOVA) for statistical comparison, which is indicated in the figure legends with p-  
617 values for each experiment.

618

## 619 **ACKNOWLEDGEMENTS**

620 We acknowledge Dr. Shu Cheng at the University of Arizona for helpful discussion and  
621 providing transcript data for this manuscript. We acknowledge Dr. Luwanika Mlera for critical

622 reading of the manuscript. We acknowledge Mark Curry and the Arizona Cancer Center/Arizona  
623 Research Laboratories Division of Biotechnology Cytometry Core Facility for expertise and  
624 assistance in flow cytometry and Patricia Jansma of the Molecular and Cellular Biology Imaging  
625 Facility for expertise in and assistance in fluorescent imaging. Special thanks to Terry Fox  
626 Laboratory for providing the M2-10B4 and SI/SI cells. We acknowledge Dr. Tom Shenk for the  
627 gift of antibodies.

628

629 This work was funded by the National Institutes of Health R01 (R01 AI079059) funded to F.G, a  
630 National Institutes of Health R01 (R01 AI21640) funded to J.N., a National Institutes of Health  
631 P01 (P01 AI127335) funded to F.G. and J.N., and a National Cancer Institute institutional T32  
632 training grant (T32CA009213-36 2014) and American Cancer Society Post-Doctoral Research  
633 Fellowship (129842-PF-16-212-01-TBE) funded to J.B.

634

## 635 REFERENCES

636

- 637 1. Mendelson M, Monard S, Sissons P, Sinclair J. Detection of endogenous human cytomegalovirus  
638 in CD34+ bone marrow progenitors. *J Gen Virol.* 1996;77(12):3099-102.
- 639 2. Cheng S, Caviness K, Buehler J, Smithey M, Nikolich-Zugich J, Goodrum F. Transcriptome-wide  
640 characterization of human cytomegalovirus in natural infection and experimental latency. *Proc Natl*  
641 *Acad Sci U S A.* 2017;114(49):E10586-e95.
- 642 3. Shnayder M, Nachshon A, Krishna B, Poole E, Boshkov A, Binyamin A, et al. Defining the  
643 Transcriptional Landscape during Cytomegalovirus Latency with Single-Cell RNA Sequencing. *mBio.*  
644 2018;9(2):e00013-18.
- 645 4. Boeckh M, Geballe AP. Cytomegalovirus: pathogen, paradigm, and puzzle. *The Journal of Clinical*  
646 *Investigation.* 2011;121(5):1673-80.
- 647 5. Ljungman P, Hakki M, Boeckh M. Cytomegalovirus in Hematopoietic Stem Cell Transplant  
648 Recipients. *Hematology/oncology clinics of North America.* 2011;25(1):151-69.
- 649 6. Razonable RR, Humar A, Practice tAIDCo. Cytomegalovirus in Solid Organ Transplantation.  
650 *American Journal of Transplantation.* 2013;13(s4):93-106.

- 651 7. Ljungman P, Engelhard D, Link H, Biron P, Brandt L, Brunet S, et al. Treatment of Interstitial  
652 Pneumonitis Due to Cytomegalovirus with Ganciclovir and Intravenous Immune Globulin: Experience of  
653 European Bone Marrow Transplant Group. *Clinical Infectious Diseases*. 1992;14(4):831-5.
- 654 8. Kuo CP, Wu CL, Ho HT, Chen CG, Liu SI, Lu YT. Detection of cytomegalovirus reactivation in  
655 cancer patients receiving chemotherapy. *Clinical Microbiology and Infection*. 2008;14(3):221-7.
- 656 9. Collins-McMillen D, Kim JH, Nogalski MT, Stevenson EV, Chan GC, Caskey JR, et al. Human  
657 Cytomegalovirus Promotes Survival of Infected Monocytes via a Distinct Temporal Regulation of Cellular  
658 Bcl-2 Family Proteins. *Journal of Virology*. 2016;90(5):2356-71.
- 659 10. Chan G, Nogalski MT, Bentz GL, Smith MS, Parmater A, Yurochko AD. PI3K-Dependent  
660 Upregulation of Mcl-1 by Human Cytomegalovirus Is Mediated by Epidermal Growth Factor Receptor  
661 and Inhibits Apoptosis in Short-Lived Monocytes. *The Journal of Immunology*. 2010;184(6):3213-22.
- 662 11. Collins-McMillen D, Stevenson EV, Kim JH, Lee B-J, Cieply SJ, Nogalski MT, et al. Human  
663 Cytomegalovirus Utilizes a Nontraditional Signal Transducer and Activator of Transcription 1 Activation  
664 Cascade via Signaling through Epidermal Growth Factor Receptor and Integrins To Efficiently Promote  
665 the Motility, Differentiation, and Polarization of Infected Monocytes. *Journal of Virology*. 2017;91(24).
- 666 12. Campadelli-Fiume G, Collins-McMillen D, Gianni T, Yurochko AD. Integrins as Herpesvirus  
667 Receptors and Mediators of the Host Signalosome. *Annual Review of Virology*. 2016;3(1):215-36.
- 668 13. Collins-McMillen D, Buehler J, Peppenelli M, Goodrum F. Molecular Determinants and the  
669 Regulation of Human Cytomegalovirus Latency and Reactivation. *Viruses*. 2018;10(8):444.
- 670 14. Goodrum F. Human Cytomegalovirus Latency: Approaching the Gordian Knot. *Annu Rev Virol*.  
671 2016;3(1):333-57.
- 672 15. Buehler J, Zeltzer S, Reitsma J, Petrucelli A, Umashankar M, Rak M, et al. Opposing Regulation of  
673 the EGF Receptor: A Molecular Switch Controlling Cytomegalovirus Latency and Replication. *PLoS*  
674 *pathogens*. 2016;12(5):e1005655.
- 675 16. Kim JH, Collins-McMillen D, Buehler JC, Goodrum FD, Yurochko AD. Human Cytomegalovirus  
676 Requires Epidermal Growth Factor Receptor Signaling To Enter and Initiate the Early Steps in the  
677 Establishment of Latency in CD34+ Human Progenitor Cells. *Journal of Virology*. 2017;91(5).
- 678 17. Wang X, Huong S-M, Chiu ML, Raab-Traub N, Huang E-S. Epidermal growth factor receptor is a  
679 cellular receptor for human cytomegalovirus. *Nature*. 2003;424(6947):456-61.
- 680 18. Umashankar M, Rak M, Bughio F, Zagallo P, Caviness K, Goodrum FD. Antagonistic determinants  
681 controlling replicative and latent states of human cytomegalovirus infection. *J Virol*. 2014;88(11):5987-  
682 6002.
- 683 19. Rak MA, Buehler J, Zeltzer S, Reitsma J, Molina B, Terhune S, et al. Human Cytomegalovirus  
684 UL135 Interacts with Host Adaptor Proteins To Regulate Epidermal Growth Factor Receptor and  
685 Reactivation from Latency. *Journal of Virology*. 2018;92(20):e00919-18.
- 686 20. Rak MAB, Jason; Zeltzer, Sebastian; Reitsema, Justin; Terhune, Scott; and Goodrum, Felicia.  
687 Human Cytomegalovirus UL135 Interacts with Host Adaptor Proteins to Regulate Epidermal Growth  
688 Factor Receptor and Reactivation from Latency. *Journal of Virology*. 2018.
- 689 21. Min IM, Pietramaggiore G, Kim FS, Passegue E, Stevenson KE, Wagers AJ. The transcription factor  
690 EGR1 controls both the proliferation and localization of hematopoietic stem cells. *Cell Stem Cell*.  
691 2008;2(4):380-91.
- 692 22. Sinzger C, Hahn G, Digel M, Katona R, Sampaio KL, Messerle M, et al. Cloning and sequencing of  
693 a highly productive, endotheliotropic virus strain derived from human cytomegalovirus TB40/E. *Journal*  
694 *of General Virology*. 2008;89(2):359-68.
- 695 23. Fairley JA, Baillie J, Bain M, Sinclair JH. Human cytomegalovirus infection inhibits epidermal  
696 growth factor (EGF) signalling by targeting EGF receptors. *Journal of General Virology*. 2002;83(11):2803-  
697 10.

- 698 24. Jafferji I, Bain M, King C, Sinclair JH. Inhibition of epidermal growth factor receptor (EGFR)  
699 expression by human cytomegalovirus correlates with an increase in the expression and binding of  
700 Wilms' Tumour 1 protein to the EGFR promoter. *Journal of General Virology*. 2009;90(7):1569-74.
- 701 25. Peppenelli MA, Arend KC, Cojohari O, Moorman NJ, Chan GC. Human Cytomegalovirus  
702 Stimulates the Synthesis of Select Akt-Dependent Antiapoptotic Proteins during Viral Entry To Promote  
703 Survival of Infected Monocytes. *Journal of Virology*. 2016;90(6):3138-47.
- 704 26. Chan G, Nogalski MT, Yurochko AD. Activation of EGFR on monocytes is required for human  
705 cytomegalovirus entry and mediates cellular motility. *Proceedings of the National Academy of Sciences*.  
706 2009;106(52):22369-74.
- 707 27. Johnson RA, Wang X, Ma X-L, Huong S-M, Huang E-S. Human Cytomegalovirus Up-Regulates the  
708 Phosphatidylinositol 3-Kinase (PI3-K) Pathway: Inhibition of PI3-K Activity Inhibits Viral Replication and  
709 Virus-Induced Signaling. *Journal of Virology*. 2001;75(13):6022-32.
- 710 28. Reitsma JM, Sato H, Nevels M, Terhune SS, Paulus C. Human Cytomegalovirus IE1 Protein  
711 Disrupts Interleukin-6 Signaling by Sequestering STAT3 in the Nucleus. *Journal of Virology*.  
712 2013;87(19):10763-76.
- 713 29. Reitsma JM, Terhune SS. Inhibition of cellular STAT3 synergizes with the cytomegalovirus kinase  
714 inhibitor maribavir to disrupt infection. *Antiviral Research*. 2013;100(2):321-7.
- 715 30. Miller CL, Eaves CJ. Long-term culture-initiating cell assays for human and murine cells. *Methods*  
716 *Mol Med*. 2002;63:123-41.
- 717 31. Umashankar M, Goodrum F. Hematopoietic long-term culture (hLTC) for human  
718 cytomegalovirus latency and reactivation. *Methods Mol Biol*. 2014;1119:99-112.
- 719 32. Waters KM, Liu T, Quesenberry RD, Willse AR, Bandyopadhyay S, Kathmann LE, et al. Network  
720 Analysis of Epidermal Growth Factor Signaling Using Integrated Genomic, Proteomic and  
721 Phosphorylation Data. *PLOS ONE*. 2012;7(3):e34515.
- 722 33. Broos S, Soete A, Hooghe B, Moran R, van Roy F, De Bleser P. PhysBinder: improving the  
723 prediction of transcription factor binding sites by flexible inclusion of biophysical properties. *Nucleic*  
724 *Acids Research*. 2013;41(W1):W531-W4.
- 725 34. Gineitis D, Treisman R. Differential Usage of Signal Transduction Pathways Defines Two Types of  
726 Serum Response Factor Target Gene. *Journal of Biological Chemistry*. 2001;276(27):24531-9.
- 727 35. Cabodi S, Morello V, Masi A, Cicchi R, Broggio C, DiStefano P, et al. Convergence of integrins and  
728 EGF receptor signaling via PI3K/Akt/FoxO pathway in early gene Egr-1 expression. *Journal of cellular*  
729 *physiology*. 2009;218(2):294-303.
- 730 36. Chakraborty S, Li L, Puliyappadamba VT, Guo G, Hatanpaa KJ, Mickey B, et al. Constitutive and  
731 ligand-induced EGFR signalling triggers distinct and mutually exclusive downstream signalling networks.  
732 *Nature Communications*. 2014;5:5811.
- 733 37. Thiel G, Cibelli G. Regulation of life and death by the zinc finger transcription factor Egr-1.  
734 *Journal of cellular physiology*. 2002;193(3):287-92.
- 735 38. Grainger L, Cicchini L, Rak M, Petrucelli A, Fitzgerald KD, Semler BL, et al. Stress-Inducible  
736 Alternative Translation Initiation of Human Cytomegalovirus Latency Protein pUL138. *J Virol*.  
737 2010;84(18):9472-86.
- 738 39. Umashankar M, Petrucelli A, Cicchini L, Caposio P, Kreklywich CN, Rak M, et al. A novel human  
739 cytomegalovirus locus modulates cell type-specific outcomes of infection. *PLoS pathogens*.  
740 2011;7(12):e1002444.
- 741 40. Caviness K, Cicchini L, Rak M, Umashankar M, Goodrum F. Complex Expression of the UL136  
742 Gene of Human Cytomegalovirus Results in Multiple Protein Isoforms with Unique Roles in Replication.  
743 *Journal of Virology*. 2014;88(24):14412-25.



- 744 41. Mikell I, Crawford LB, Hancock M, Mitchell J, Buehler J, Goodrum F, et al. HCMV miR-US22 down  
745 -regulation of Egr-1 regulates CD34+ Hematopoietic Progenitor Cell Proliferation and Viral Reactivation.  
746 PLoS pathogens. 2019.
- 747 42. Englert C, Hou X, Maheswaran S, Bennett P, Ngwu C, Re GG, et al. WT1 suppresses synthesis of  
748 the epidermal growth factor receptor and induces apoptosis. *The EMBO journal*. 1995;14(19):4662-75.
- 749 43. Ritchie MF, Yue C, Zhou Y, Houghton PJ, Soboloff J. Wilms tumor suppressor 1 (WT1) and early  
750 growth response 1 (EGR1) are regulators of STIM1 expression. *The Journal of biological chemistry*.  
751 2010;285(14):10591-6.
- 752 44. Bentz GL, Yurochko AD. Human CMV infection of endothelial cells induces an angiogenic  
753 response through viral binding to EGF receptor and beta1 and beta3 integrins. *Proc Natl Acad Sci U S A*.  
754 2008;105(14):5531-6.
- 755 45. Chan G, Nogalski MT, Stevenson EV, Yurochko AD. Human cytomegalovirus induction of a  
756 unique signalsome during viral entry into monocytes mediates distinct functional changes: a strategy for  
757 viral dissemination. *J Leukoc Biol*. 2012;92(4):743-52.
- 758 46. Avraham R, Yarden Y. Feedback regulation of EGFR signalling: decision making by early and  
759 delayed loops. *Nature reviews Molecular cell biology*. 2011;12(2):104-17.
- 760 47. Lindsey S, Langhans SA. Epidermal growth factor signaling in transformed cells. *Int Rev Cell Mol*  
761 *Biol*. 2015;314:1-41.
- 762 48. Lupberger J, Duong FH, Fofana I, Zona L, Xiao F, Thumann C, et al. Epidermal growth factor  
763 receptor signaling impairs the antiviral activity of interferon-alpha. *Hepatology*. 2013;58(4):1225-35.
- 764 49. Yamashita M, Chattopadhyay S, Fensterl V, Saikia P, Wetzel JL, Sen GC. Epidermal growth factor  
765 receptor is essential for Toll-like receptor 3 signaling. *Science signaling*. 2012;5(233):ra50.
- 766 50. Ortega J, Li JY, Lee S, Tong D, Gu L, Li GM. Phosphorylation of PCNA by EGFR inhibits mismatch  
767 repair and promotes misincorporation during DNA synthesis. *Proc Natl Acad Sci U S A*.  
768 2015;112(18):5667-72.
- 769 51. Camarena V, Kobayashi M, Kim JY, Roehm P, Perez R, Gardner J, et al. Nature and Duration of  
770 Growth Factor Signaling through Receptor Tyrosine Kinases Regulates HSV-1 Latency in Neurons. *Cell*  
771 *Host & Microbe*. 2010;8(4):320-30.
- 772 52. Cliffe Anna R, Arbuckle Jesse H, Vogel Jodi L, Geden Matthew J, Rothbart Scott B, Cusack  
773 Corey L, et al. Neuronal Stress Pathway Mediating a Histone Methyl/Phospho Switch Is Required for  
774 Herpes Simplex Virus Reactivation. *Cell Host & Microbe*. 2015;18(6):649-58.
- 775 53. Strunk U, Ramos DG, Saffran HA, Smiley JR. Role of Herpes simplex virus 1 VP11/12 tyrosine-  
776 based binding motifs for Src family kinases, p85, Grb2 and Shc in activation of the phosphoinositide 3-  
777 kinase-Akt pathway. *Virology*. 2016;498:31-5.
- 778 54. Chuluunbaatar U, Roller R, Mohr I. Suppression of Extracellular Signal-Regulated Kinase Activity  
779 in Herpes Simplex Virus 1-Infected Cells by the Us3 Protein Kinase. *Journal of Virology*.  
780 2012;86(15):7771-6.
- 781 55. Miller WE, Earp HS, Raab-Traub N. The Epstein-Barr virus latent membrane protein 1 induces  
782 expression of the epidermal growth factor receptor. *J Virol*. 1995;69(7):4390-8.
- 783 56. Miller WE, Mosialos G, Kieff E, Raab-Traub N. Epstein-Barr virus LMP1 induction of the  
784 epidermal growth factor receptor is mediated through a TRAF signaling pathway distinct from NF-  
785 kappaB activation. *J Virol*. 1997;71(1):586-94.
- 786 57. Kung C-P, Meckes DG, Raab-Traub N. Epstein-Barr Virus LMP1 Activates EGFR, STAT3, and ERK  
787 through Effects on PKCδ. *Journal of Virology*. 2011;85(9):4399-408.
- 788 58. Morrison JA, Klingelutz AJ, Raab-Traub N. Epstein-Barr virus latent membrane protein 2A  
789 activates beta-catenin signaling in epithelial cells. *J Virol*. 2003;77(22):12276-84.
- 790 59. Swart R, Ruf IK, Sample J, Longnecker R. Latent membrane protein 2A-mediated effects on the  
791 phosphatidylinositol 3-Kinase/Akt pathway. *J Virol*. 2000;74(22):10838-45.

- 792 60. Iwakiri D, Minamitani T, Samanta M. Epstein-Barr Virus Latent Membrane Protein 2A  
793 Contributes to Anoikis Resistance through ERK Activation. *Journal of Virology*. 2013;87(14):8227-34.
- 794 61. Peng L, Wu TT, Tchieu JH, Feng J, Brown HJ, Li X, et al. Inhibition of the phosphatidylinositol 3-  
795 kinase-Akt pathway enhances gamma-2 herpesvirus lytic replication and facilitates reactivation from  
796 latency. *The Journal of general virology*. 2010;91(Pt 2):463-9.
- 797 62. Ford PW, Bryan BA, Dyson OF, Weidner DA, Chintalgattu V, Akula SM. Raf/MEK/ERK signalling  
798 triggers reactivation of Kaposi's sarcoma-associated herpesvirus latency. *Journal of General*  
799 *Virology*. 2006;87(5):1139-44.
- 800 63. Dyson OF, Traylen CM, Akula SM. Cell Membrane-bound Kaposi's Sarcoma-associated  
801 Herpesvirus-encoded Glycoprotein B Promotes Virus Latency by Regulating Expression of Cellular Egr-1.  
802 *Journal of Biological Chemistry*. 2010;285(48):37491-502.
- 803 64. Ritchie MF, Yue C, Zhou Y, Houghton PJ, Soboloff J. Wilms Tumor Suppressor 1 (WT1) and Early  
804 Growth Response 1 (EGR1) Are Regulators of STIM1 Expression. *Journal of Biological Chemistry*.  
805 2010;285(14):10591-6.
- 806 65. Bedadala GR, Pinnoji RC, Hsia S-CV. Early Growth Response gene 1 (Egr-1) regulates HSV-1 ICP4  
807 and ICP22 gene expression. *Cell Research*. 2007;17:546.
- 808 66. Chang Y, Lee H-H, Chen Y-T, Lu J, Wu S-Y, Chen C-W, et al. Induction of the Early Growth  
809 Response 1 Gene by Epstein-Barr Virus Lytic Transactivator Zta. *Journal of Virology*. 2006;80(15):7748-  
810 55.
- 811 67. Wu L-W. Role of Egr-1 in regulation of caveolin-1 gene expression in endothelial cells. *Cancer*  
812 *Research*. 2006;66(8 Supplement):31-.
- 813 68. Warming S, Costantino N, Court DL, Jenkins NA, Copeland NG. Simple and highly efficient BAC  
814 recombinering using galk selection. *Nucleic Acids Research*. 2005;33(4):e36.
- 815 69. Petrucelli A, Rak M, Grainger L, Goodrum F. Characterization of a novel Golgi apparatus-localized  
816 latency determinant encoded by human cytomegalovirus. *J Virol*. 2009;83(11):5615-29.
- 817 70. Pfaffl MW. A new mathematical model for relative quantification in real-time RT-PCR. *Nucleic*  
818 *acids research*. 2001;29(9):e45-e.
- 819 71. Umashankar M, Rak M, Bughio F, Zagallo P, Caviness K, Goodrum F. Antagonistic Determinants  
820 Controlling Replicative and Latent States of Human Cytomegalovirus Infection. *Journal of Virology*. 2014.
- 821 72. Hu Y, Smyth GK. ELDA: Extreme limiting dilution analysis for comparing depleted and enriched  
822 populations in stem cell and other assays. *Journal of Immunological Methods*. 2009;347(1-2):70-8.

823

## 824 **Figure Legends**

825

### 826 **Figure 1. CMV downregulates EGFR surface and total protein levels as infection**

827 **progresses.** Fibroblasts were infected with TB40E<sub>GFP</sub> virus at an MOI of 1 for 0-72 hpi. (A) To

828 measure EGFR surface levels, infected cells were stained with BV421 conjugated m $\alpha$ -EGFR

829 antibody and analyzed by flow cytometry. Normalized geometric mean fluorescent intensity is

830 shown. (B) Total EGFR levels were measured over a time course by immunoblotting. Blots were



831 stained with rb  $\alpha$ -EGFR, ms  $\alpha$ -IE1/2 antibody, and ms  $\alpha$ -Tubulin. Both surface and total EGFR  
832 levels were normalized to 0 hpi for statistical analysis. IE proteins serve as a control for infection  
833 and tubulin serves as a control for loading. (C) Relative EGFR mRNA levels were measured  
834 over a time course using quantitative reverse transcriptase PCR and SYBR green. EGFR  
835 transcripts are normalized to H6PD, cellular housekeeping control, at each timepoint. (A-C)  
836 Statistical significance was calculated by One-Way ANOVA with Tukey's correction and  
837 represented by asterisks (\*\*\*) p-values < 0.001). Graphs represent the means from 3  
838 independent replicates with error bars representing SEM. (D) Subcellular localization of EGFR  
839 was monitored over a time course of infection. Nuclei, EGFR and IE2 are visualized by staining  
840 with DAPI, rb  $\alpha$ -EGFR, and ms  $\alpha$ -IE2 and confocal deconvolution microscopy.

841

842 **Figure 2. CMV infection prevents activation of AKT and MEK1/2.** (A) Fibroblasts were  
843 serum starved for 24h and cells were then infected for 0-72 hpi. At each timepoint, infected cells  
844 were pulsed with 10 nM of EGF for 0-30 min, and lysed. Lysates were separated out on SDS-  
845 PAGE gel, transferred on PVDF membrane, and stained for rb  $\alpha$ -EGFR, rb  $\alpha$ -pEGFR(Y1068), rb  
846  $\alpha$ -pAKT(S472), rb  $\alpha$ -pMEK1/2(S217/221), ms  $\alpha$ -IE1/2 antibody, and ms  $\alpha$ -Tubulin. (B) The 15  
847 min post EGF timepoint for all phosphorylation markers were normalized to uninfected cells and  
848 graphed to calculate statistics. Statistical significance was calculated by One-Way ANOVA with  
849 Tukey's correction and represented by asterisks (\* p-value < 0.05 and \*\* p-value < 0.01). Graphs  
850 represent the mean of three replicates and error bars represent SEM.

851

852 **Figure 3. Inhibition of MEK/ERK and PI3K/AKT signaling stimulates reactivation in CD34<sup>+</sup>**  
853 **HPCs, but only inhibition of PI3K/AKT stimulates replication in fibroblasts.** (A) Fibroblasts  
854 were infected with TB40E<sub>GFP</sub> virus (MOI=1). At 24 hpi, cells were treated with DMSO, MEK/ERK

855 inhibitors (Binimetinib 1  $\mu$ M; SCH772984 125nM), STAT (Fludarabine 50  $\mu$ M; S3I-201 100  $\mu$ M),  
856 PI3K/AKT (LY294002 20  $\mu$ M; MK-2206 1.25  $\mu$ M), PLC $\gamma$  (U73122 4  $\mu$ M). At 8 dpi media and  
857 cells were collected and viral titers were determined by TCID<sub>50</sub>. (B) CD34<sup>+</sup> HPCs were infected  
858 with TB40E<sub>GFP</sub> virus (MOI=2). At 24 hpi, CD34<sup>+</sup>/GPF<sup>+</sup> cells were sorted and put into long-term  
859 culture with inhibitor list above. After 10 days, parallel populations of either mechanically lysed  
860 cells or whole cells were plated onto fibroblasts monolayers in cytokine-rich media and  
861 frequency of infectious centers was determined by limited dilution analysis. The mechanically  
862 lysed population defines the quantity of virus present prior to reactivation (pre-reactivation). The  
863 whole cell population undergoes differentiation due to fibroblasts contact and cytokine  
864 stimulation, which promotes viral reactivation (reactivation). The frequency was normalized to  
865 the pre-reactivation DMSO control to facilitate comparisons between experiments. Statistical  
866 significance was calculated by One-Way ANOVA with Tukey's correction for each condition and  
867 represented by asterisks (\* p-value < 0.05, \*\* p-value < 0.01, \*\*\* p-value < 0.001, and \*\*\*\* p-  
868 value < 0.0001). For fludarabine infected fibroblasts ANOVA could not measure difference due  
869 to absence of quantifiable virus and statistical significance was calculated by student t-test (\*\*\*\*  
870 p-value < 0.0001). Data graphed is the mean of 3 replicates with error bars representing SEM.

871

872 **Figure 4. EGF-stimulation promotes *UL138* expression through *EGR1* expression. (A)**

873 Fibroblasts were infected with TB40E<sub>GFP</sub> (MOI=1) and put into serum-free media at 24hpi. Cells  
874 were stimulated with 10nM EGF at 48 hpo and cells were harvested between 1 and 24 hours  
875 post stimulation. Lysates were separated by SDS-PAGE, transfer onto a member, and blotted  
876 with ms  $\alpha$ - IE1/2, rb  $\alpha$ -*UL135*, rb  $\alpha$ -*UL138*, and ms- $\alpha$  Tubulin. Protein levels from 4 replicates  
877 were normalized to no EGF treated control and 1h post EGF treatment is graphed. Statistical  
878 significance was calculated by student t-test; asterisks \*\*\* p-value < 0.001. Error bars represent  
879 SEM.(B) Graphical representation of putative *EGR1* binding sites located within *UL135* ORF

880 starting at nt-306 and nt-896, in reference to UL135 start codon. P-values were calculated using  
881 PhysBinder prediction software. (C) Fibroblasts were transduced with EGR1<sub>3xFlag</sub> lentivirus and  
882 then infected with wildtype or *UL133/8<sub>null</sub>* mutant (negative control; NC) TB40E virus (MOI=1).  
883 Chromatin was immunoprecipitated (ChIP) with IgG or antibodies specific to EGR1 or histone 3  
884 (H3) and EGR1 binding Site 1 or Site 2 was detected in the precipitates by PCR. As a control,  
885 PCR was also performed on 2% of the ChIP input. Gel is a representative experiment from 3  
886 replicates. (D) A model demonstrating how EGFR signaling promotes EGR1 expression by  
887 either directing its expression through MEK/ERK signaling or by blocking FOXO1 suppression of  
888 EGR1 transcription through PI3K/AKT signaling. (E) Fibroblasts were transduced with either  
889 EGR1<sub>3xFlag</sub> or Empty vector control and after 24h infected with TB40E<sub>GFP</sub>. At 48 hpi, protein  
890 lysates were collected, separated by SDS-PAGE and blotted using rb  $\alpha$ -FLAG, rb  $\alpha$ -*UL138*, and  
891 ms  $\alpha$ -Tubulin. (F) HEK293T cells were co-transfected with EGR1<sub>3xFlag</sub>, *UL133/8* encoding  
892 plasmid, or empty vector (minus sign). After 48h, samples were separated by SDS-PAGE and  
893 blotted for ms  $\alpha$ -FLAG, rb  $\alpha$ -*UL138*, and ms  $\alpha$ -Tubulin. (E-F) *UL138* protein levels from either  
894 4(E) or 3(F) independent experiments were normalized to control and shown in graphs.  
895 Statistical significance was calculated by student t-test; asterisks indicate \* p-value < 0.05 and  
896 \*\* p-value < 0.01. Error bars represent SEM. (G) Fibroblasts were infected with 1 MOI of wild  
897 type or  $\Delta$ miR-US22 TB40E<sub>GFP</sub> virus and serum starved overnight before treating with 50 ng/mL  
898 of EGF. Samples were collected at 3 and 4 dpi, then separated on a SDS-PAGE gel, and  
899 blotted for ms  $\alpha$ -EGR1, rb  $\alpha$ -*UL138*, ms  $\alpha$ -IE1, and ms  $\alpha$ -GAPDH. Normalized values for EGR1  
900 and *UL138* protein are below each band. Blot is representative of two independent experiments.

901

902 **Figure 5. EGR1 levels are elevated during latent infection in CD34<sup>+</sup> HPCs, but not during**  
903 **replication in fibroblasts.** (A) CD34<sup>+</sup> HPCs were infected with TB40E<sub>GFP</sub> (MOI=2). At 2 and 6  
904 dpi, we isolated RNA and prepared mRNA libraries for Illumina sequencing. Relative expression

905 of EGR1, EGR2, EGR3, and WT1 was calculated by fragments per kilobase per million reads  
906 (FPKM) and normalized to EGR1 2 dpi levels. Error bars represent the range of gene  
907 expression between two independent donors. (B) Fibroblasts were infected with TB40E<sub>GFP</sub>  
908 (MOI=1) and RNA was isolated at 0-72 hpi. EGR1 mRNA was quantified relative to H6PD by  
909 RT-qPCR. Results from 3 independent replicates are graphed error bars represent SEM.  
910 Statistical significance was calculated by One-Way ANOVA with Tukey's correction and  
911 represented by an asterisk (\* p-value < 0.05). (C) Fibroblasts were infected with TB40E<sub>GFP</sub>  
912 (MOI=1) and transferred to serum-free media at 24 hpi. At 48 hpi, samples were pulsed with 10  
913 nM of EGF for 1 h. Lysates were separated by SDS-PAGE and immunoblotted with rb  $\alpha$ -EGR1,  
914 ms  $\alpha$ -IE1/2, and ms  $\alpha$ -tubulin. EGR1 protein levels were normalized to the uninfected sample  
915 stimulated with EGF and the mean from 3 independent replicates is graphed. Error bars  
916 represent SEM. We calculated statistical significance by two-way ANOVA with Tukey's  
917 correction and represented significance by asterisks (\* p-value < 0.05; \*\*\*\* p-value < 0.0001).

918

919 **Figure 6. Mutation of EGR1 binding sites blocks induction of *UL138*.** (A) HEK293T cells  
920 were co-transfected with either empty vector or EGR1<sub>3xFLAG</sub> and a plasmid contain UL133/8 or a  
921 mutant plasmid lacking one EGR1 binding site,  $\Delta$ Site 1 or  $\Delta$ Site 2. At 48 h lysates were  
922 separated by SDS-PAGE, and blotted for rb  $\alpha$ -Flag, rb  $\alpha$ -UL138, and ms  $\alpha$ -tubulin. *UL138*  
923 protein levels in EGR1<sub>3xFLAG</sub> transfections were normalized to control levels to determine *UL138*  
924 induction. The results from 4 independent replicates are graphed. Statistical significance was  
925 calculated by One-Way ANOVA with Bonferroni correction (\* p-value < 0.05 and \*\* p-value <  
926 0.01). (B) HEK293T cells were cotransfected with the UL133/8 vector or the UL133/8 vector  
927 where EGR1 sites ( $\Delta$ Site1,  $\Delta$ Site 2) were disrupted and negative control siRNA, EGR1 siRNA,  
928 or miR-US22. Cells were transferred to serum-free media at 24 h. At 48 hpi, samples were  
929 stimulated with 50 ng/mL EGF for 1h and then lysed, separated by SDS-PAGE, and blotted for

930 rb  $\alpha$ -UL138 and ms  $\alpha$ -GAPDH. *UL 138* levels are normalized to negative control. A  
931 representative blot of 2 independent experiments is shown.

932

933 **Figure 7. Disruption of EGR1 site 1 blocks EGR1 binding during infection.** (A) Fibroblasts  
934 were infected with wild type TB40E<sub>GFP</sub> or EGR1 binding mutant viruses,  $\Delta$ Site 1 or  $\Delta$ Site 2  
935 (MOI=0.02). Cells and media were collected from 0-16 dpi and virus titers measured by TCID<sub>50</sub>.  
936 The average of 3 independent replicate experiments is shown. (B) Fibroblasts were infected  
937 wild type or EGR1 binding mutant viruses. Samples were lysed at 48 hpi, separated by SDS-  
938 PAGE and blotted for ms  $\alpha$ -IE1/2, rb  $\alpha$ -UL135, and rb  $\alpha$ -UL138, and ms  $\alpha$ -tubulin. UL138 protein  
939 levels were quantified and each mutant was normalized to WT over 3 independent experiments.  
940 The average value is graphed with error bars representing SEM and statistical significance is  
941 calculated by One-way ANOVA with Bonferroni correction (\* p-value <0.05). (C) Fibroblasts  
942 were transduced with EGR1<sub>3xFlag</sub> lentivirus for 24 h and then infected with wild type TB40E<sub>GFP</sub> or  
943 TB40E- $\Delta$ EGR1<sub>Site 1</sub> mutant virus (MOI=1). After 48 h, samples were immunoprecipitated for  
944 either IgG or EGR1 and processed for ChIP-qPCR using SimpleChIP Enzymatic Chromatin IP  
945 Kit (Cell Signaling). (D) Fibroblasts were infected with wild type TB40E<sub>GFP</sub> or TB40E- $\Delta$ EGR1<sub>Site 1</sub>  
946 mutant virus (MOI=1) and transferred to serum-free media at 24 hpi. At 48 hpi, samples were  
947 pulsed with 10 nM EGF for 1h and processed for ChIP-qPCR as was done in E. For both E and  
948 F, the presence of EGR1 Site 1 sequence was calculated relative to a 2% input control  
949 ( $Relative\ expression = 0.02 \times 2^{(CT_{2\% input} - CT_{ChIP})}$ ) and normalized to wild type levels.

950

951 **Figure 8. Inhibition of EGR1 binding to site 1 disrupts CMV latency.** (A) CD34<sup>+</sup> HPCs were  
952 infected with either wildtype TB40E<sub>GFP</sub> or TB40E- $\Delta$ EGR1<sub>Site 1</sub> mutant virus (MOI=2). At 24 hpi,  
953 CD34<sup>+</sup>/GPF<sup>+</sup> cells were sorted and seeded into long-term culture. After 10 days in culture,

954 parallel populations of either mechanically lysed cells or whole cells were plated onto fibroblast  
955 monolayers in cytokine-rich media. 14 days later, GFP+ wells were scored and frequency of  
956 infectious centers was determined by extreme limited dilution analysis (reactivation). The  
957 mechanically lysed population defines the quantity of virus present prior to reactivation (pre-  
958 reactivation). The frequency was normalized to wild type pre-activation and the average of  
959 three independent experiments is shown. Statistical significance was calculated by one-way  
960 ANOVA with Tukey's correction and represented by asterisks (\* p-value < 0.05).

961

962 **Figure 9. UL138 expression is regulated by a positive feedback mechanisms through**  
963 **EGFR signaling.** Our data demonstrates that EGFR signaling promotes *UL138* expression  
964 through an upstream EGR1 binding site within a promoter in the UL133/8 locus that remains to  
965 be mapped. The EGFR signaling pathway drives the establishment of latency, at least in part,  
966 by stimulating *UL138* expression, which can function to sustain EGFR signaling. While we have  
967 previously shown that UL135 targets EGFR for turnover, miR-US22 provides an additional point  
968 of control for reactivation in targeting EGR1.

969

## 970 SUPPORTING INFORMATION

971 **Figure S1. Phosphorylation screen of EGFR signaling pathways during CMV infection.**  
972 Fibroblasts were infected with TB40E<sub>GFP</sub> (MOI=1) for 48 h. Cells were then stimulated with 10  
973 nM EGF for 30 min and lysed for PathScan EGFR Signaling Antibody Array Kit (Cell Signaling)  
974 analysis. Parallel unstimulated samples were lysed for comparison. Phosphorylation levels for  
975 EGFR, MEK/ERK, AKT, and STAT3 markers were normalized to uninfected, no EGF levels and  
976 graphed. Data represents two independent screens each containing two internal technical  
977 replicates. Error bars represent the range of the means from each experiment.

978

979 **Figure S2. Confirmation of chemical inhibition.** Fibroblasts were treated with (A) DMSO, (B)  
980 MEK/ERK inhibitors (Binimetinib; SCH772984), (C) STAT (Fludarabine; S3I-201), (D) PI3K/AKT  
981 (LY294002; MK-2206), (E) PLC $\gamma$  (U73122) and lysates were isolated from 1-5 days. Samples  
982 were separated by SDS-PAGE and blotted for rb  $\alpha$ -pAKT(S472), rb  $\alpha$ -pERK1/2(T202/204), rb  $\alpha$ -  
983 pSTAT3(Y705), ms  $\alpha$ -IE1/2 antibody, and ms  $\alpha$ -Tubulin. Inhibitor protein phosphorylation levels  
984 were normalized to DMSO controls.

985

986 **Figure S3. Diagram of EGR1 binding site mutation.** *UL135* nucleotide sequence was altered  
987 in both a pGEM-T virus plasmid and TB40E<sub>GFP</sub> bacteria artificial chromosome backbone to  
988 disrupt EGR1 binding site 1 (A) and EGR1 binding site 2 (B). Mutations were engineered into  
989 the wobble codon in order to alter the nucleotide sequence but not the amino acid sequence of  
990 UL135. Binding sequence for each site is underlined and nucleotides mutated are indicated in  
991 grey boxes and bolded text.

992



Figure 1

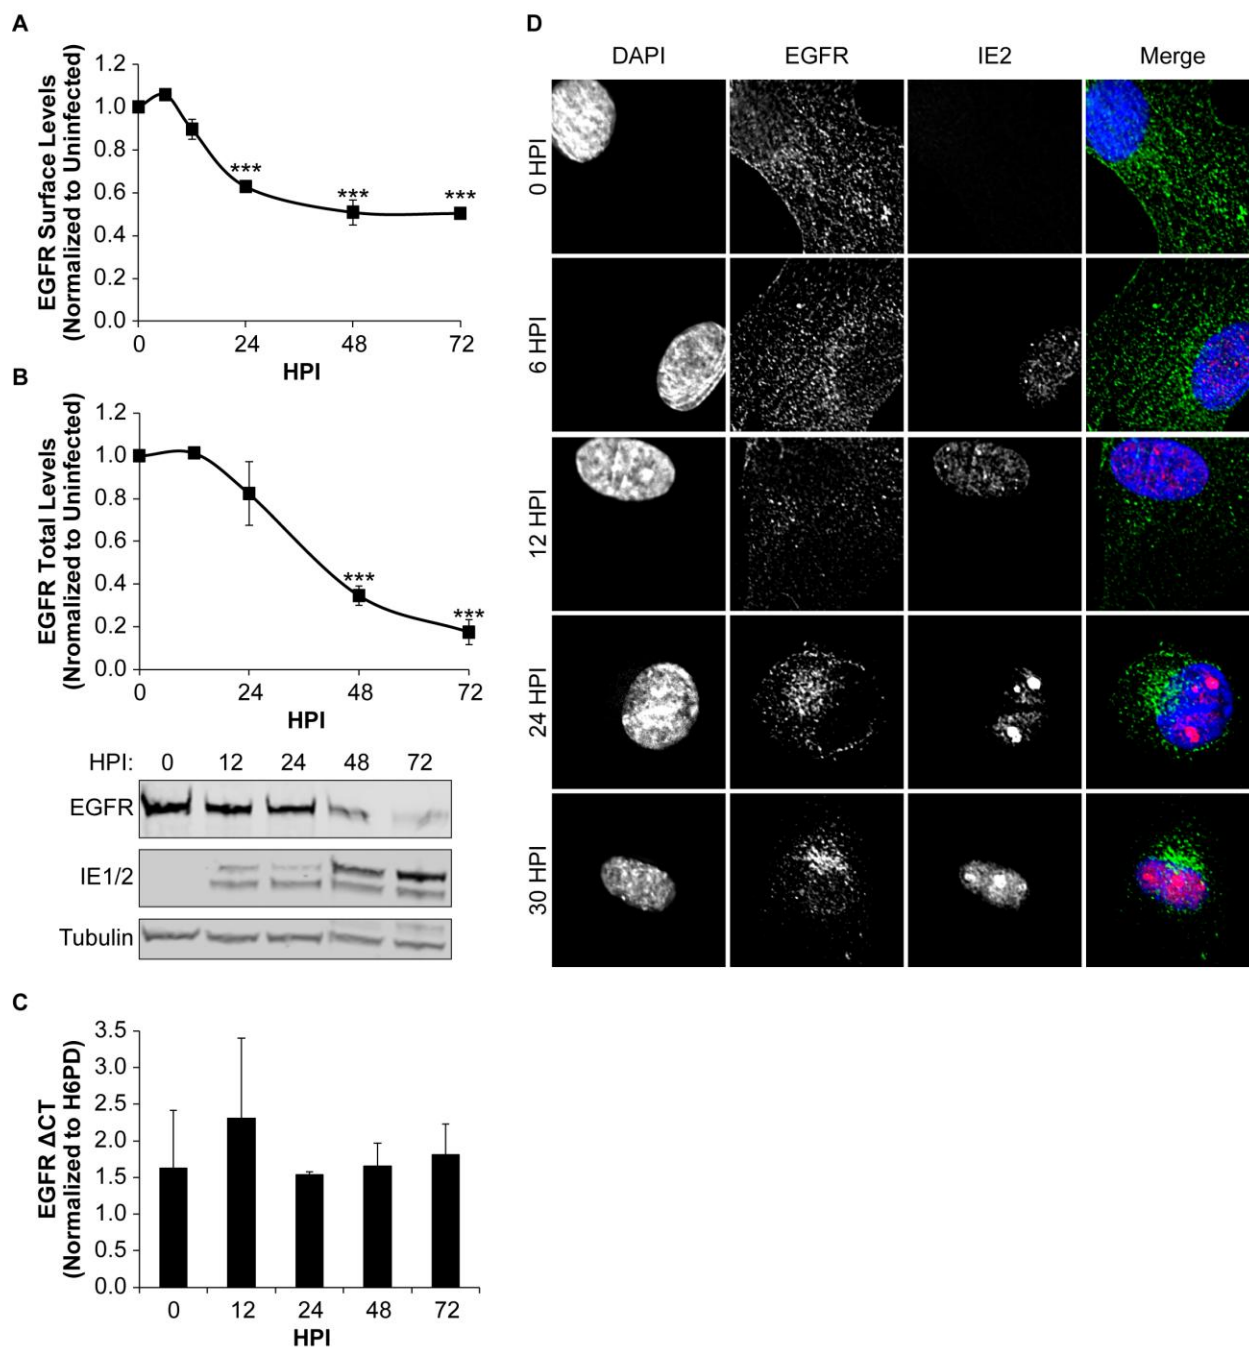

993

994



Figure 2

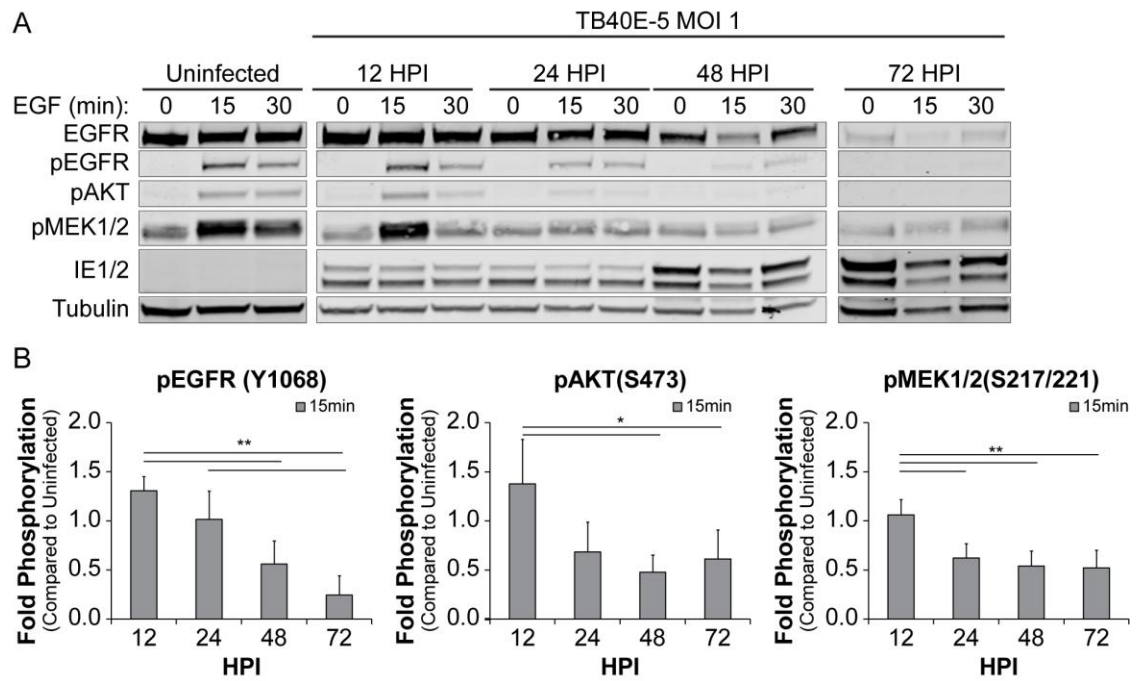

Figure 3

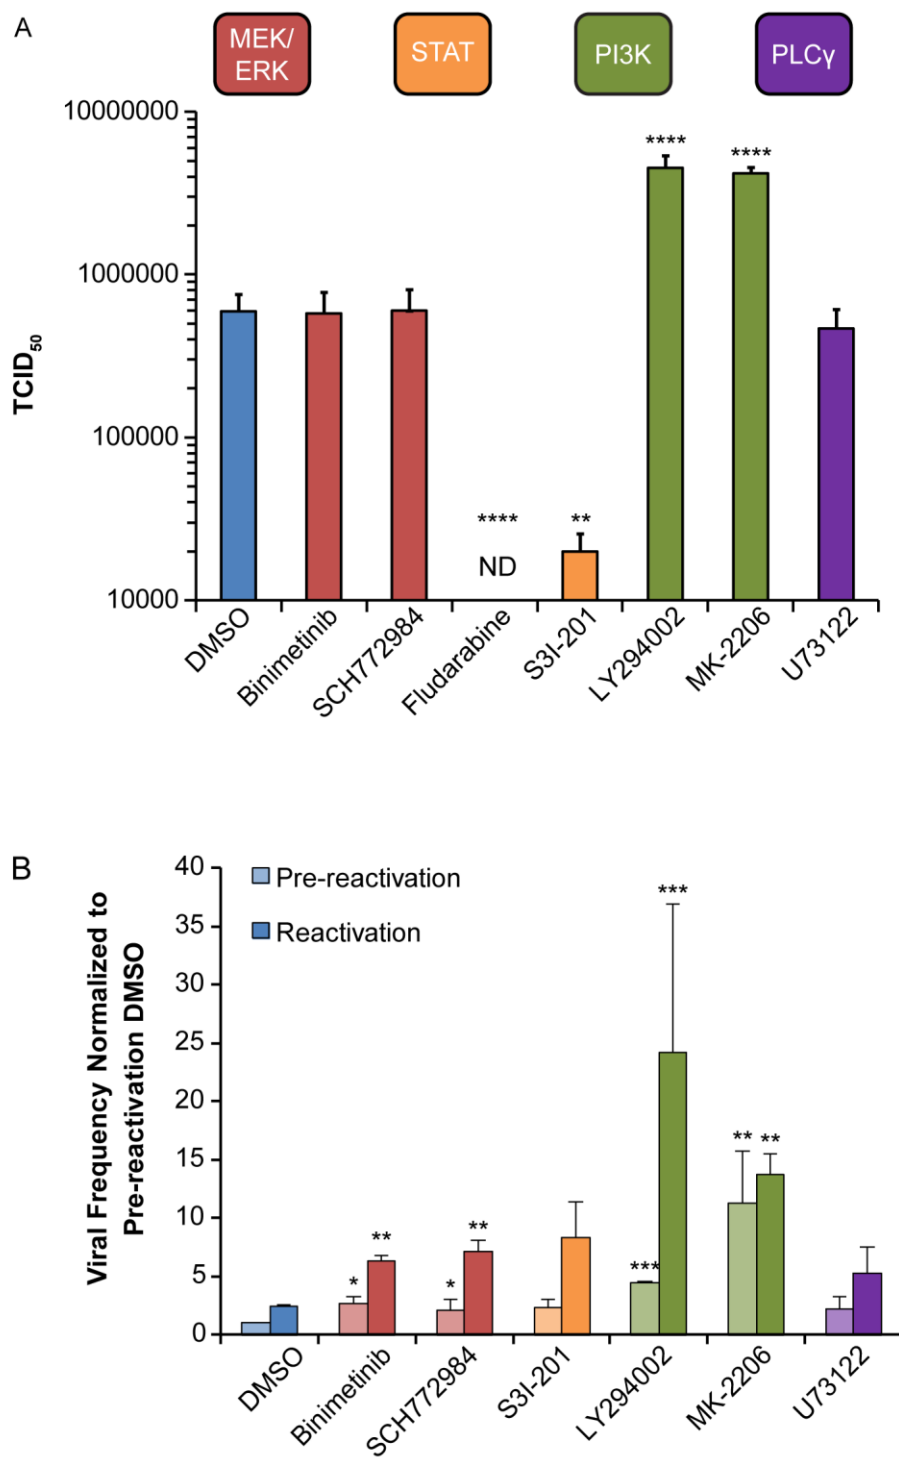

997

998

Figure 4

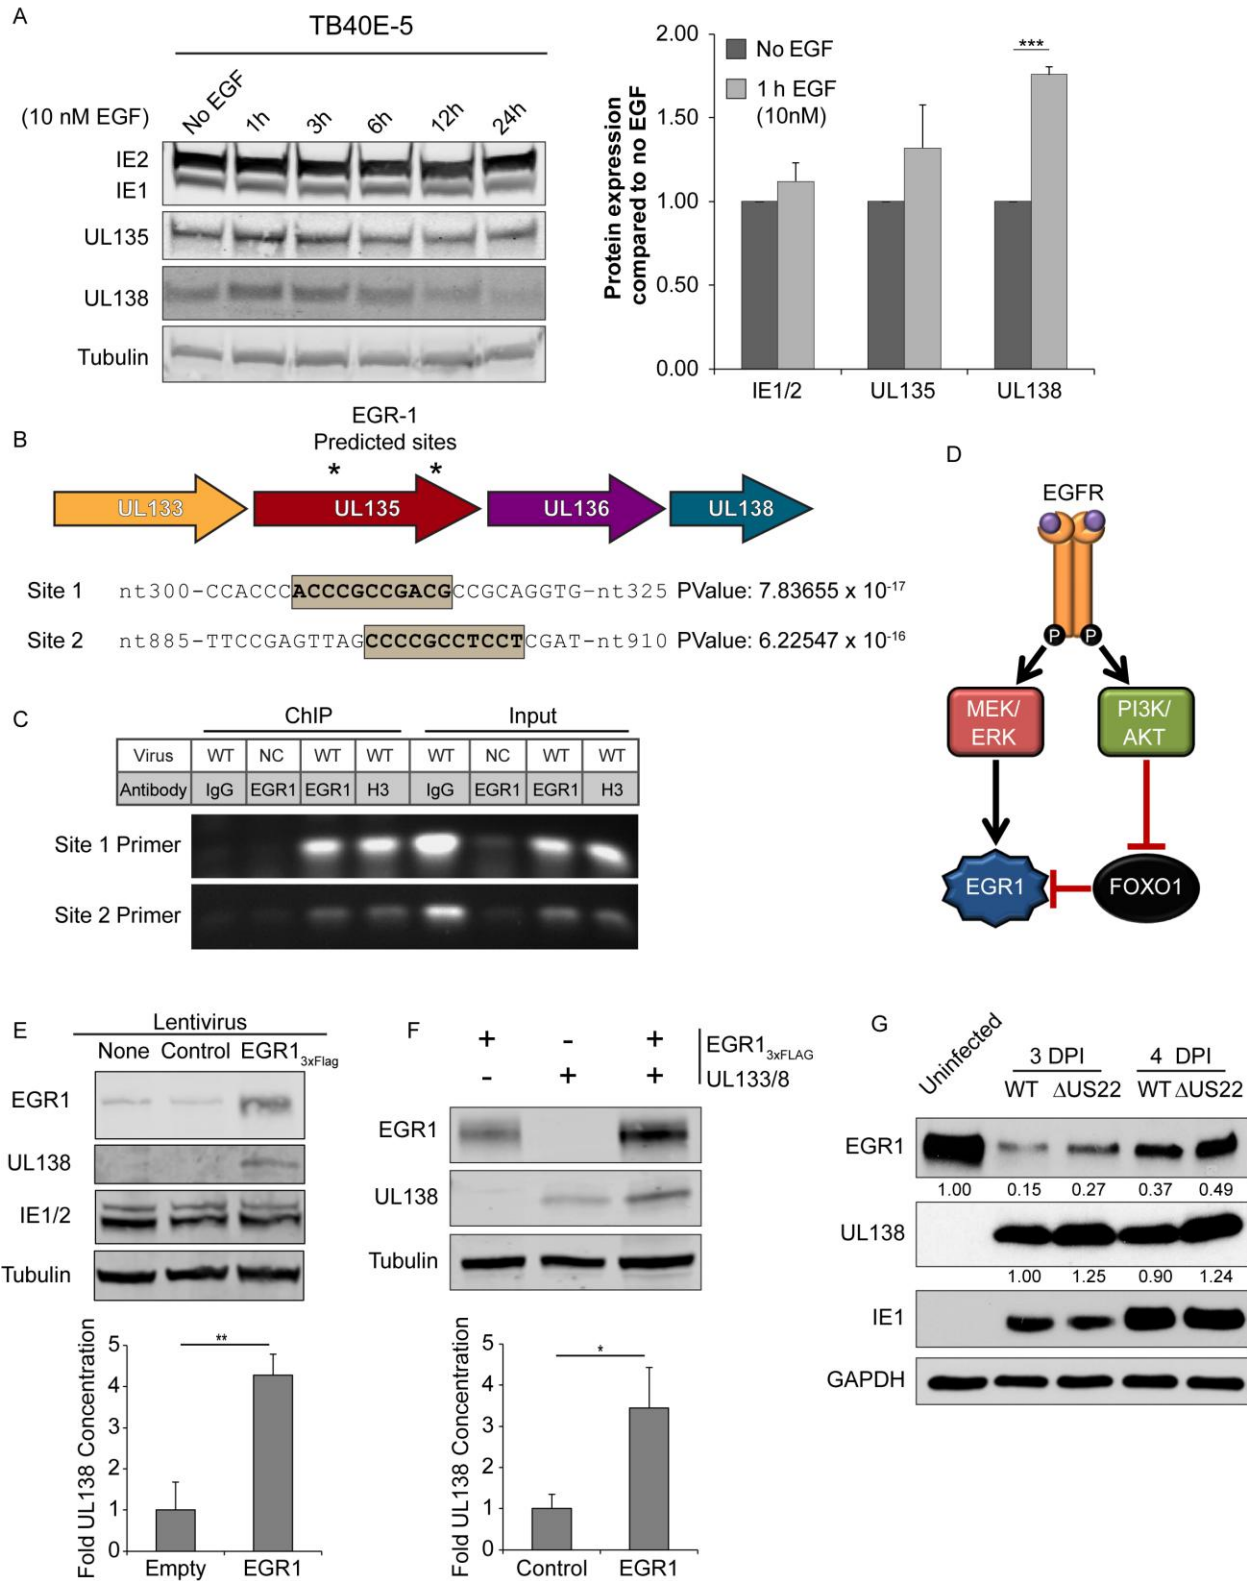

Figure 5

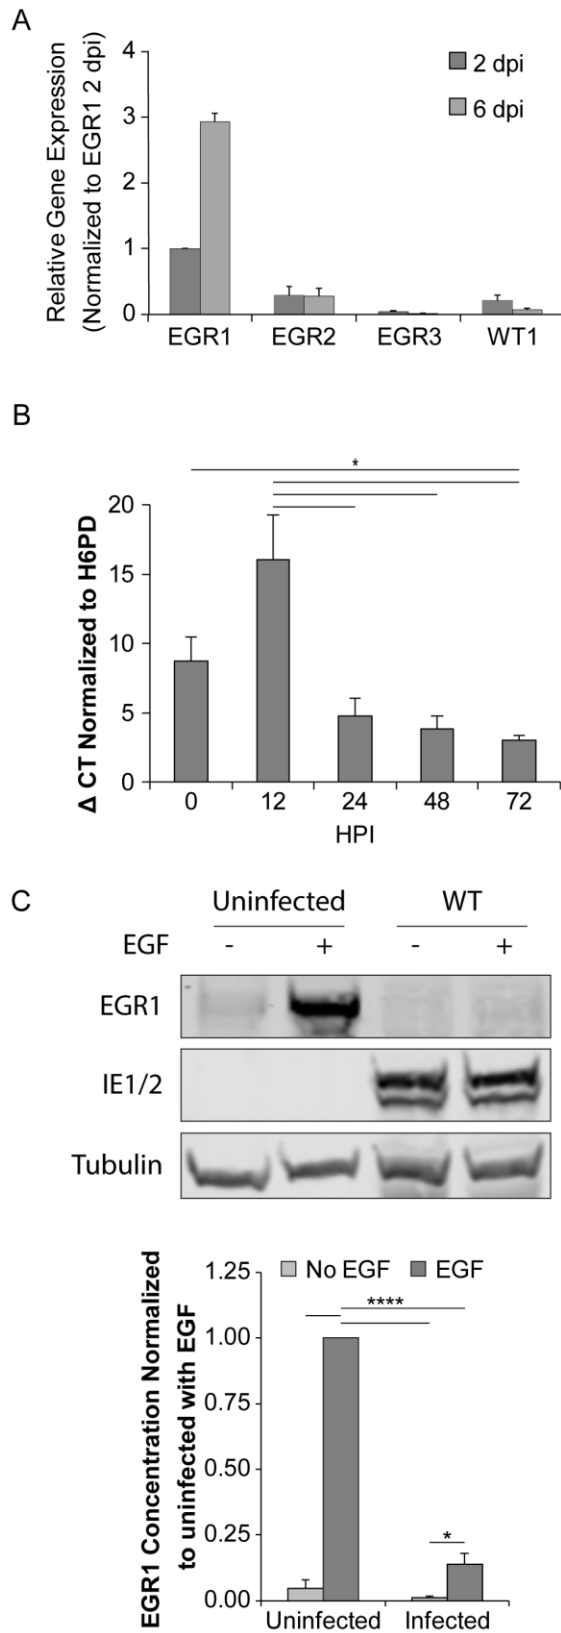

Figure 6

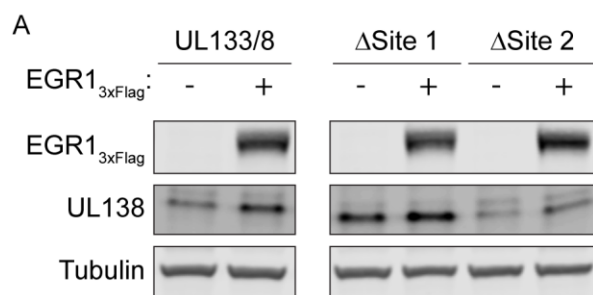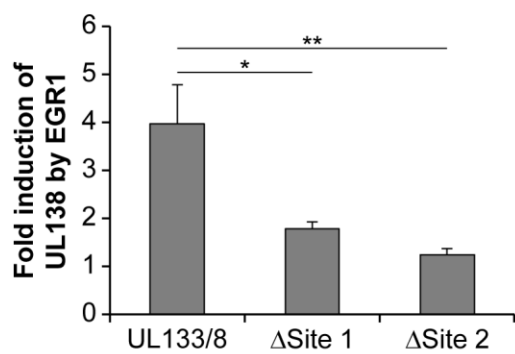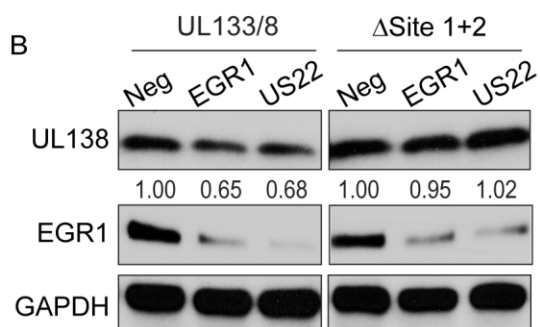

1001

1002

Figure 7

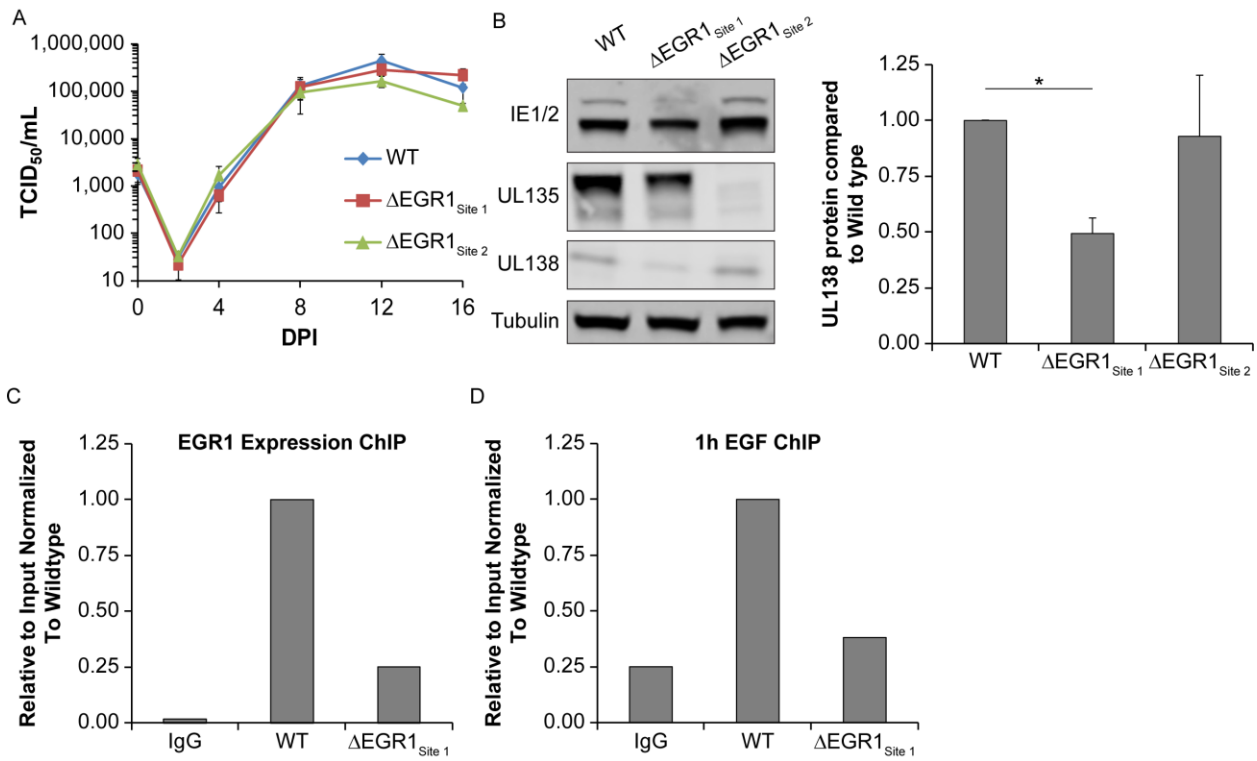

1003

1004

Figure 8

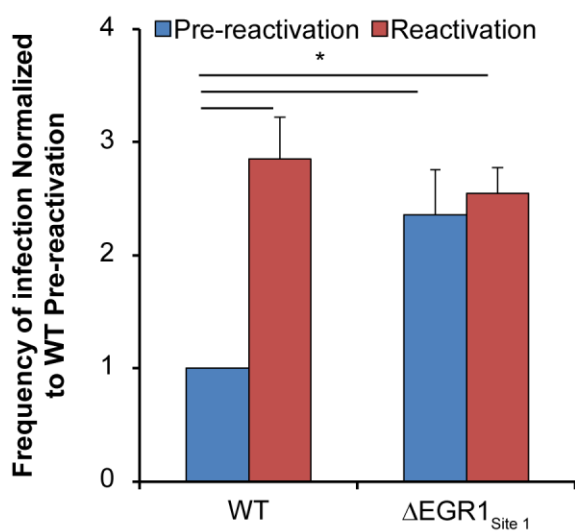

1005

1006

Figure 9

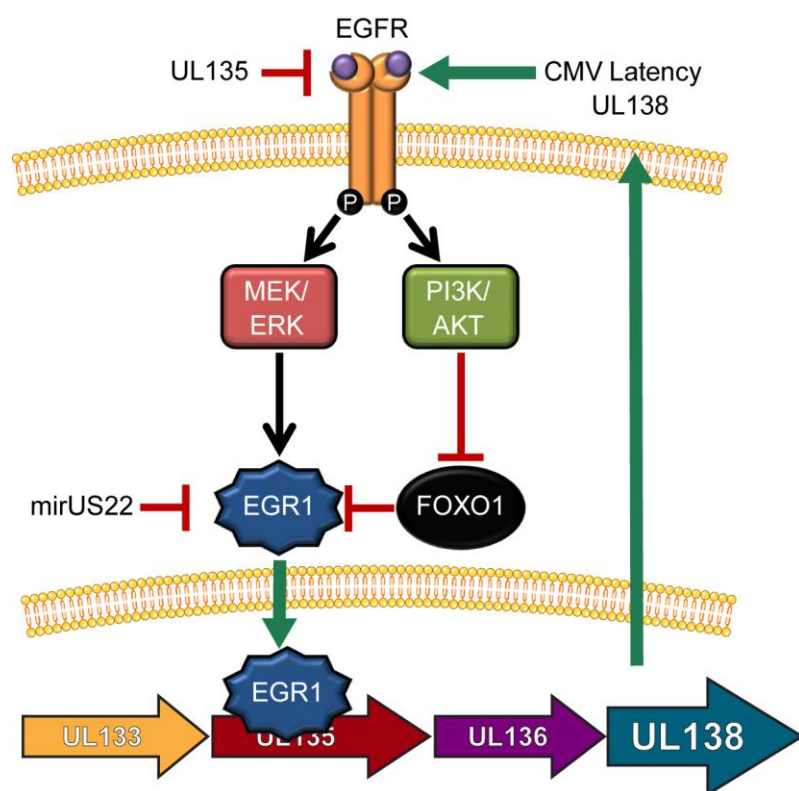

1007

1008



Figure S1

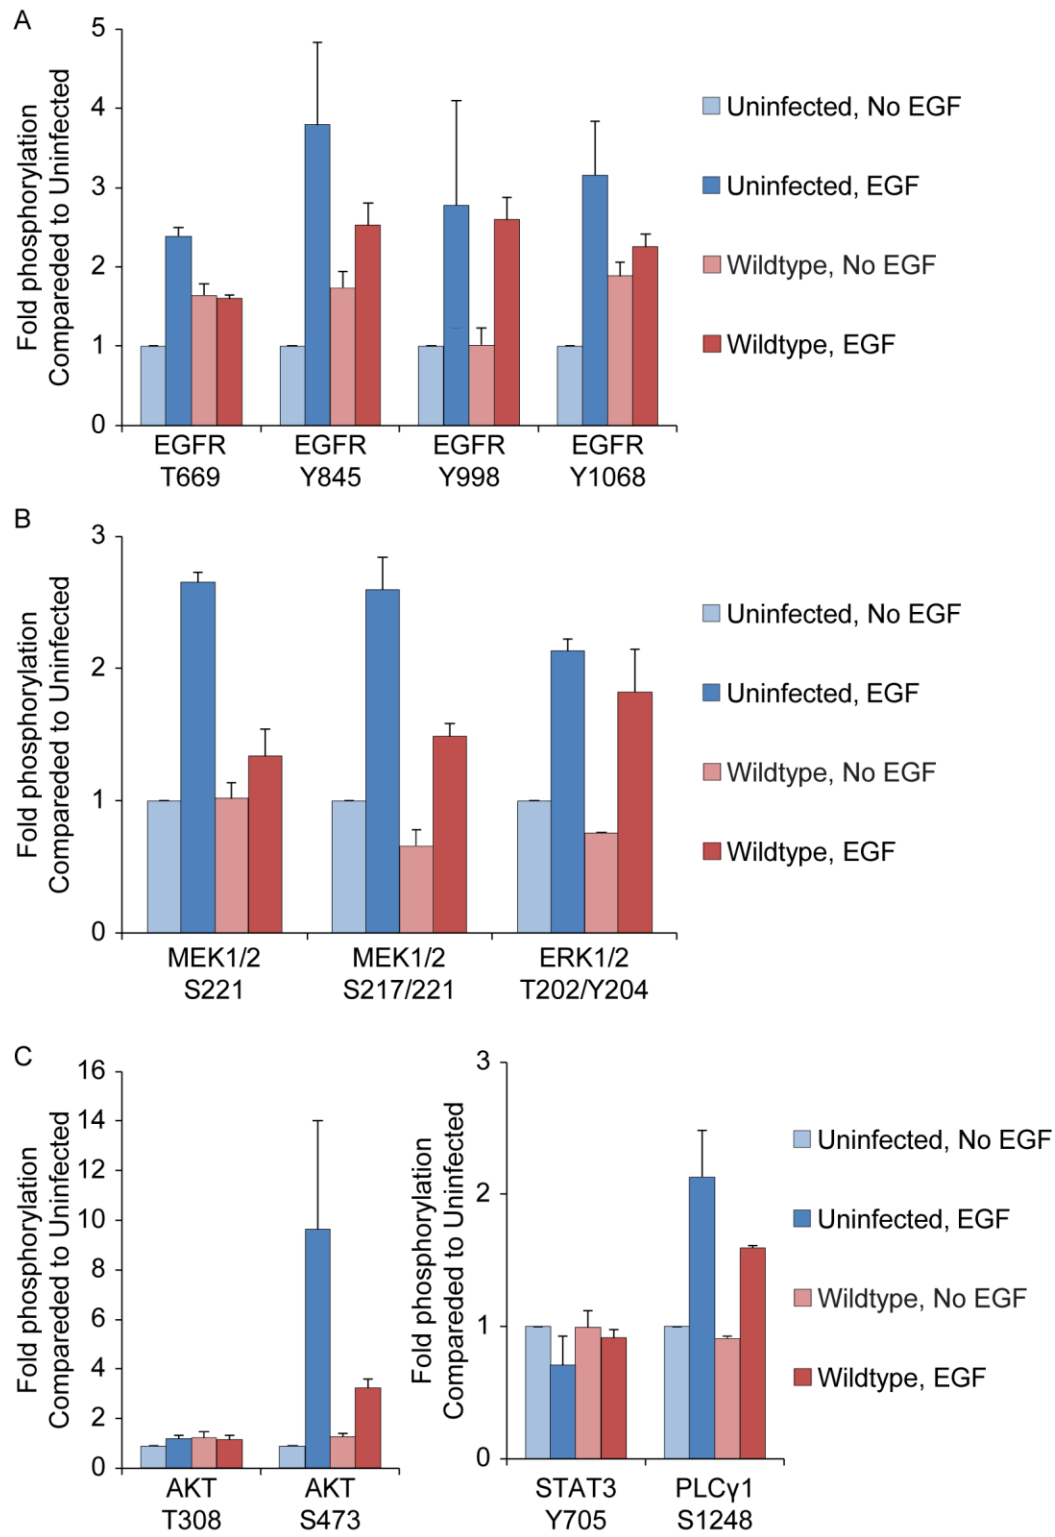

1009

1010

Figure S2

A. No drug

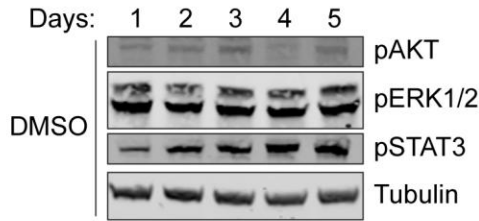

B. MEK/ERK inhibitors

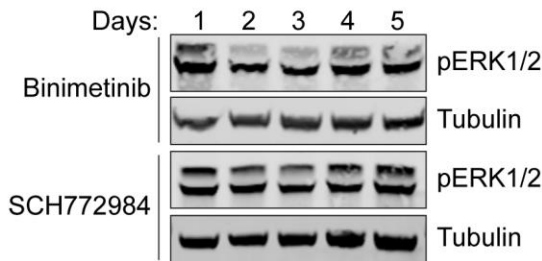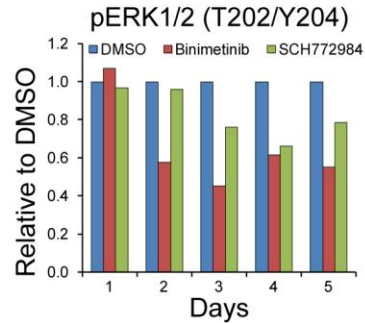

C. PI3K/AKT inhibitors

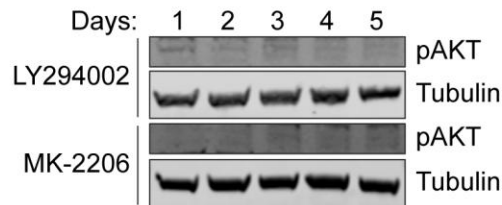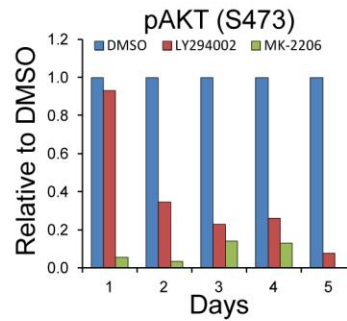

D. STAT inhibitors

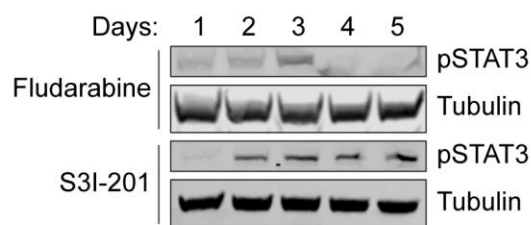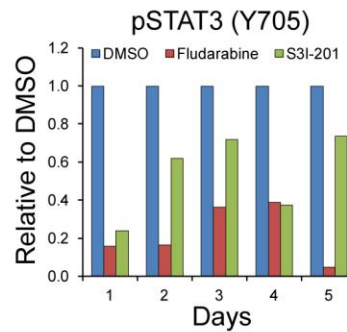

E. PLC $\gamma$  inhibitor

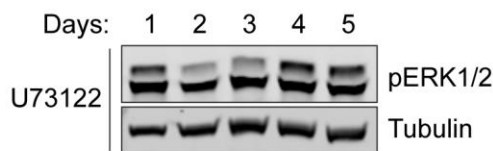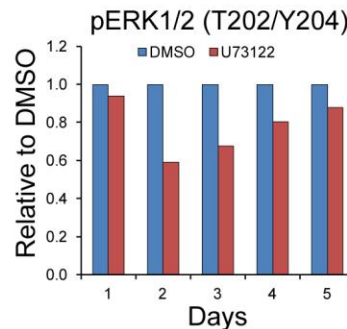

Figure S3

A

|           |    |          |          |          |          |          |          |          |          |  |
|-----------|----|----------|----------|----------|----------|----------|----------|----------|----------|--|
|           |    | <b>T</b> | <b>H</b> | <b>P</b> | <b>P</b> | <b>T</b> | <b>P</b> | <b>Q</b> | <b>V</b> |  |
| Wildtype- | CC | ACC      | CAC      | CCG      | CCG      | ACG      | CCG      | CAG      | GTG      |  |
| ΔSite 1-  | CC | ACC      | CAC      | CC       | CC       | A        | CC       | CAG      | GTG      |  |
|           |    | <b>T</b> | <b>H</b> | <b>P</b> | <b>P</b> | <b>T</b> | <b>P</b> | <b>Q</b> | <b>V</b> |  |

B

|           |    |          |          |          |          |          |          |          |          |  |
|-----------|----|----------|----------|----------|----------|----------|----------|----------|----------|--|
|           |    | <b>S</b> | <b>E</b> | <b>L</b> | <b>A</b> | <b>P</b> | <b>P</b> | <b>P</b> | <b>R</b> |  |
| Wildtype- | TT | CCG      | AGT      | TAG      | CCCCG    | CC       | TCC      | T        | CGAT     |  |
| ΔSite 2-  | TT | CCG      | AGT      | TAG      | CCCC     | CC       | A        | CC       | CGAT     |  |
|           |    | <b>S</b> | <b>E</b> | <b>L</b> | <b>A</b> | <b>P</b> | <b>P</b> | <b>P</b> | <b>R</b> |  |

1012

1013
